# Supplementary material
Source: PubMed Central journal article supplement (PMC3954433)
Supplement: ol500266z_si_002.pdf [file ol500266z_si_002.pdf]

## *Supporting Information*

### **Caeruleanone A, a Rotenoid with a New Arrangement of the D-ring from the Fruits of *Millettia caerulea***

**Lynette Bueno Pérez,<sup>†</sup> Li Pan,<sup>†</sup> Ulyana Muñoz Acuña,<sup>‡</sup> Jie Li,<sup>†</sup> Hee-Byung Chai,<sup>†</sup> Judith C.**

**Gallucci,<sup>||</sup> Tran Ngoc Ninh,<sup>§</sup> Esperanza J. Carcache de Blanco,<sup>†,‡</sup> Djaja D. Soejarto,<sup>#,§</sup>**

**A. Douglas Kinghorn<sup>\*,†</sup>**

*Division of Medicinal Chemistry and Pharmacognosy, Division of Pharmacy Practice and Administration, College of Pharmacy, Department of Chemistry and Biochemistry, The Ohio State University, Columbus, Ohio 43210, United States, Institute of Ecology and Biological Resources, Vietnam Academy of Science and Technology, Hanoi, Vietnam, Department of Medicinal Chemistry and Pharmacognosy, College of Pharmacy, University of Illinois at Chicago, Chicago, Illinois, 60612-7231, United States, and Botany Department, Field Museum, Chicago, Illinois 60605-2496, United States*

<sup>†</sup> Division of Medicinal Chemistry and Pharmacognosy, College of Pharmacy, The Ohio State University.

<sup>‡</sup> Division of Pharmacy Practice and Administration, College of Pharmacy, The Ohio State University.

<sup>||</sup> Department of Chemistry and Biochemistry, The Ohio State University.

<sup>§</sup> Institute of Ecology and Biological Resources, Vietnam Academy of Science and Technology.

<sup>#</sup> Department of Medicinal Chemistry and Pharmacognosy, College of Pharmacy, University of Illinois at Chicago.

<sup>§</sup> Botany Department, Field Museum, Chicago, Illinois.

\*Corresponding author. Tel. +1-614-247-8094; Fax: +1-614-247-8642.

E-mail address: [kinghorn.4@osu.edu](mailto:kinghorn.4@osu.edu) (A. D. Kinghorn)

## Table of Contents

- S1. General experimental procedures.
- S2. Plant material.
- S3. Extraction scheme.
- S4. Characterization of new compounds **1-3**.
- S5. X-ray crystallographic details of **1**.
- S6. Isolation of known compounds **4-14**.
- S7. Structures of known compounds isolated from *M. caerulea*.
- S8. Characterization of known compounds **10-11** and **13-14**.
- S9. <sup>1</sup>H NMR spectrum of **1** from -1.0 to 10.0 ppm (CDCl<sub>3</sub>, 400 MHz).
- S10. Amplification of region 1.0-3.0 ppm of <sup>1</sup>H NMR spectrum of **1** (CDCl<sub>3</sub>, 400 MHz).
- S11. Amplification of region 3.3-5.0 ppm of <sup>1</sup>H NMR spectrum of **1** (CDCl<sub>3</sub>, 400 MHz).
- S12. Amplification of region 5.5-7.5 ppm of <sup>1</sup>H NMR spectrum of **1** (CDCl<sub>3</sub>, 400 MHz).
- S13. <sup>13</sup>C NMR spectrum of **1** from -10.0 to 210 ppm (CDCl<sub>3</sub>, 100 MHz).
- S14. Amplification of region 0 - 80.0 ppm <sup>13</sup>C NMR spectrum of **1** (CDCl<sub>3</sub>, 100 MHz).
- S15. Amplification of region 95.0 - 150.0 ppm <sup>13</sup>C NMR spectrum of **1** (CDCl<sub>3</sub>, 100 MHz).
- S16. <sup>13</sup>C DEPT 135 NMR spectrum of **1** (CDCl<sub>3</sub>, 100 MHz).
- S17. HSQC NMR spectrum of **1** (CDCl<sub>3</sub>, 400 MHz).
- S18. <sup>1</sup>H-<sup>1</sup>H COSY NMR spectrum of **1** (CDCl<sub>3</sub>, 400 MHz).
- S19. HMBC NMR spectrum of **1** (CDCl<sub>3</sub>, 400 MHz).
- S20. NOESY NMR spectrum of **1** (CDCl<sub>3</sub>, 400 MHz).
- S21. <sup>1</sup>H NMR spectrum of **2** from -1.0 to 10.0 ppm (CDCl<sub>3</sub> with 0.05% v/v TMS, 400 MHz).
- S22. Amplification of region 3.2 – 5.9 ppm <sup>1</sup>H NMR spectrum of **2** (CDCl<sub>3</sub> with 0.05% v/v TMS, 400 MHz).
- S23. <sup>13</sup>C DEPT 135 NMR spectrum of **2** (CDCl<sub>3</sub>, 100 MHz).
- S24. <sup>13</sup>C NMR spectrum of **2** (CDCl<sub>3</sub>, 100 MHz).
- S25. Amplification of region 98.0 – 158.0 ppm <sup>13</sup>C NMR spectrum of **2** (CDCl<sub>3</sub>, 100 MHz).
- S26. HSQC NMR spectrum of **2** (CDCl<sub>3</sub>, 400 MHz).
- S27. <sup>1</sup>H-<sup>1</sup>H COSY NMR spectrum of **2** (CDCl<sub>3</sub>, 400 MHz).
- S28. HMBC NMR spectrum of **2** (CDCl<sub>3</sub>, 400 MHz).
- S29. NOESY NMR spectrum of **2** (CDCl<sub>3</sub>, 400 MHz).
- S30. <sup>1</sup>H NMR spectrum of **3** from -1.0 to 10.0 ppm (CDCl<sub>3</sub> with 0.05% v/v TMS, 400 MHz).
- S31. <sup>13</sup>C DEPT 135 NMR spectrum of **3** (CDCl<sub>3</sub>, 100 MHz).
- S32. <sup>13</sup>C NMR spectrum of **3** (CDCl<sub>3</sub>, 100 MHz).
- S33. Amplification of region 95.0 – 160.0 ppm <sup>13</sup>C NMR spectrum of **3** (CDCl<sub>3</sub>, 100 MHz).
- S34. HSQC NMR spectrum of **3** (CDCl<sub>3</sub>, 400 MHz).
- S35. <sup>1</sup>H-<sup>1</sup>H COSY NMR spectrum of **3** (CDCl<sub>3</sub>, 400 MHz).
- S36. HMBC NMR spectrum of **3** (CDCl<sub>3</sub>, 400 MHz).
- S37. NOESY NMR spectrum of **3** (CDCl<sub>3</sub>, 400 MHz).
- S38. Procedures used for in vitro testing of isolates.

## **S1. General experimental procedures.**

Melting point was obtained in a Fisher Scientific melting point device and is uncorrected. Specific rotations were measured on a Perkin-Elmer 343 automatic polarimeter. UV spectra measurements were performed using a Hitachi U-2910 UV/vis spectrometer. ECD spectra were measured with a JASCO J-810 spectropolarimeter. IR spectra were obtained on a Thermo Scientific Nicolet 6700 FT-IR spectrometer. NMR spectra were run at room temperature on Bruker Avance DRX-400 MHz spectrometer and the data were processed using MestReNova 6.0 software (Mestrelab Research SL, Santiago de Compostela, Spain). Accurate mass values were recorded on a Micromass Q-ToF II ESI spectrometer. Sodium iodide was used for mass calibration for a calibration range of  $m/z$  100-2000. Column chromatography (CC) was carried out using silica gel (65-250 or 230-400 mesh; Sorbent Technologies, Atlanta, GA) and Sephadex LH-20 (Sigma-Aldrich, St. Louis, MO). Analytical TLC was conducted on precoated 200  $\mu\text{m}$  thickness silica gel UV<sub>254</sub> aluminum-backed plates (Sorbent Technologies). Waters XBridge<sup>®</sup> analytical (4.6 × 150 mm), semi-preparative (10 × 150 mm), and preparative (19 × 150 mm) OBD C<sub>18</sub> (5  $\mu\text{m}$ ) columns were used for HPLC, as conducted on a Waters system composed of a 600 controller, a 717 Plus autosampler, and a 2487 dual wavelength absorbance detector.

## **S2. Plant material.**

The fruits of *M. caerulea* were collected on July 28, 2011 at Nui Chua National Park (11° 37.998'; 109° 09.633' E Alt.: 70 masl.) in Southern Vietnam by D. D. Soejarto, T. N. Ninh and B. V. Thanh. D. D. Soejarto identified this plant and a voucher specimen (DDS 14879) was deposited in the John G. Searle Herbarium of the Field Museum of Natural History, Chicago, Illinois.

### S3. Extraction scheme

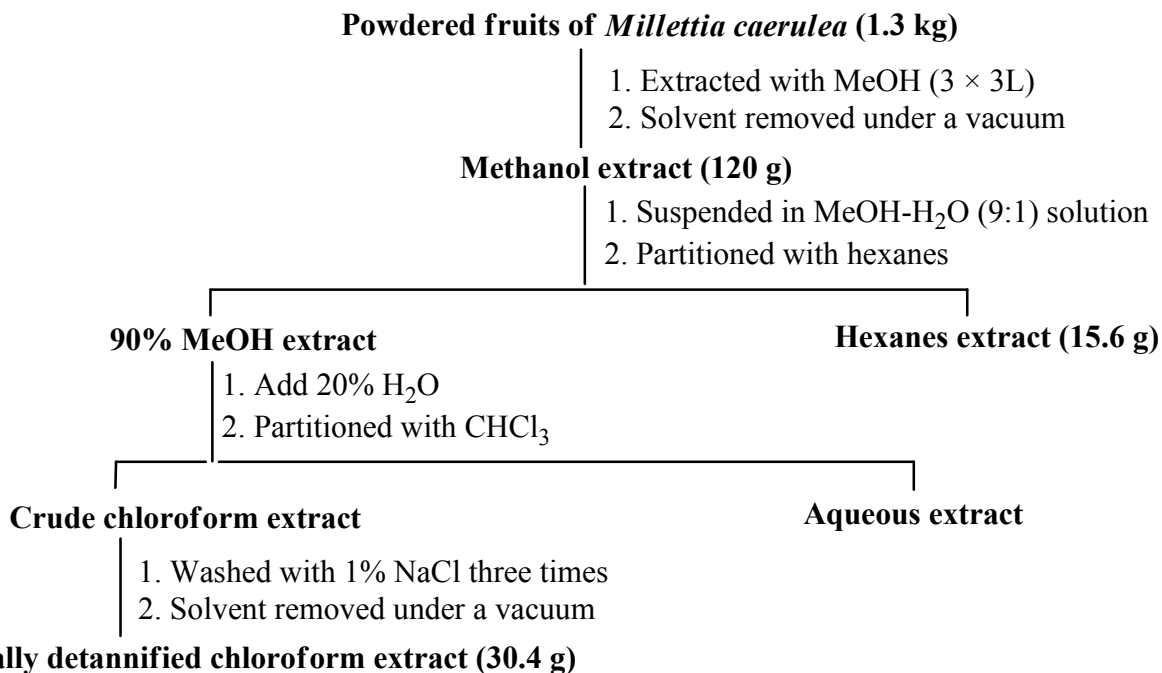

### S4. Characterization of new compounds 1-3.

Caeruleanone A (**1**): colorless prisms; mp 148-151°C;  $[\alpha]_D^{20}$  0 (*c* 0.1, CHCl<sub>3</sub>); UV (MeOH)  $\lambda_{\max}$  (log  $\epsilon$ ) 208 (4.47) nm; 220 (sh, 4.27) nm; 304 (4.14) nm; 360 (3.61) nm; IR (film)  $\nu_{\max}$  2968, 2911, 1663, 1629, 1483, 1420, 1413, 1340, 1312, 1192, 1160, 1055, 1043, 938, 913, 862, 837, 755 cm<sup>-1</sup>; <sup>1</sup>H NMR (400 MHz, CDCl<sub>3</sub>) and <sup>13</sup>C NMR (100 MHz, CDCl<sub>3</sub>) data, see Tables 1 and 2 in manuscript; HRESIMS *m/z* 501.1890 [M + Na]<sup>+</sup> (calcd for C<sub>28</sub>H<sub>30</sub>O<sub>7</sub>Na, 501.1889).

Caeruleanone B (**2**): colorless solid;  $[\alpha]_D^{20}$  0 (*c* 0.1, CHCl<sub>3</sub>); UV (MeOH)  $\lambda_{\max}$  (log  $\epsilon$ ) 205 (4.50) nm; 220 (sh, 4.31) nm; 279 (3.81) nm; 346 (3.40) nm; IR (film)  $\nu_{\max}$  3424, 2958, 2851, 1733, 1673, 1600, 1502, 1471, 1464, 1432, 1375, 1325, 1280, 1261, 1207, 1169, 1097, 1036, 799, 758, 701 cm<sup>-1</sup>; <sup>1</sup>H NMR (400 MHz, CDCl<sub>3</sub>) and <sup>13</sup>C NMR (100 MHz, CDCl<sub>3</sub>) data, see Tables 1 and 2 in manuscript; HRESIMS *m/z* 517.1844 [M + Na]<sup>+</sup> (calcd for C<sub>28</sub>H<sub>30</sub>O<sub>8</sub>Na, 517.1838).

Caeruleanone C (**3**): white powder;  $[\alpha]_D^{20}$  +17.0 (*c* 0.15, acetone); UV (MeOH)  $\lambda_{\max}$  (log  $\epsilon$ ) 211 (4.45) nm; 240 (sh, 4.10) nm; 293 (3.99) nm; 342 (3.66) nm; ECD (MeOH) 311 ( $\Delta\epsilon$  1.62), 359 (-0.86) nm; IR (film)  $\nu_{\max}$  3433, 2917, 1667, 1600, 1480, 1467, 1435, 1334, 1287, 1249, 1201, 1169, 1090, 1081, 1055, 1040, 935, 908, 755 cm<sup>-1</sup>; <sup>1</sup>H NMR (400 MHz, CDCl<sub>3</sub>) and <sup>13</sup>C NMR (100 MHz, CDCl<sub>3</sub>) data, see Tables 1 and 2 in manuscript; HRESIMS *m/z* 449.1216 [M + Na]<sup>+</sup> (calcd for C<sub>23</sub>H<sub>22</sub>O<sub>8</sub>Na, 449.1212).

## S5. X-ray crystallographic details of **1**.

The data collection crystal was a colorless plate, which had been cut from a much larger plate. Examination of the diffraction pattern on a Nonius Kappa CCD diffractometer indicated a monoclinic crystal system. All work was done at 150 K using an Oxford Cryosystems Cryostream Cooler. The data collection strategy was set up to measure a quadrant of reciprocal space with a redundancy factor of 4.6, which means that 90% of these reflections were measured at least 4.6 times. Phi and omega scans with a frame width of 1.0° were used. Data integration was done with Denzo,<sup>1</sup> and scaling and merging of the data was done with Scalepack.<sup>1</sup> Merging the data and averaging the symmetry equivalent reflections resulted in an Rint value of 0.045.

The structure was solved by the direct methods procedure in SHELXS-97.<sup>2</sup> Full-matrix least-squares refinements based on  $F^2$  were performed in SHELXL-97,<sup>3</sup> as incorporated in the WinGX package.<sup>4</sup> There are two independent molecules in the asymmetric unit.

For the methyl groups, the hydrogen atoms were added at calculated positions using a riding model with  $U(H) = 1.5 * U_{eq}(\text{bonded carbon atom})$ . The torsion angle, which defines the orientation of the methyl group about the C-O or C-C bond, was refined. The rest of the hydrogen atoms were included in the model at calculated positions using a riding model with  $U(H) = 1.2 * U_{eq}(\text{bonded atom})$ . Neutral atom scattering factors were used and include terms for anomalous dispersion.<sup>5</sup>

### References:

- (1) Otwinowski, Z.; Minor, W. *Methods Enzymol.* **1997**, *276*, 307-326.
- (2) SHELXS-97: Sheldrick, G. M. *Acta Cryst.* **2008**, *A64*, 112-122.
- (3) SHELXL-97: Sheldrick, G. M. *Acta Cryst.* **2008**, *A64*, 112-122.
- (4) WinGX-Version 1.70.01: Farrugia, L. J. *J. Appl. Cryst.* **1999**, *32*, 837-838.
- (5) International Tables for Crystallography (1992). Volume C. Dordrecht: Kluwer Academic Publishers.

**Table 1.** Crystallographic details for 1.

|                                   |                                                                            |
|-----------------------------------|----------------------------------------------------------------------------|
| Formula                           | C <sub>28</sub> H <sub>30</sub> O <sub>7</sub>                             |
| Formula weight                    | 478.52                                                                     |
| Temperature                       | 150(2) K                                                                   |
| Wavelength                        | 0.71073 Å                                                                  |
| Crystal system                    | monoclinic                                                                 |
| Space group                       | P2 <sub>1</sub> /c                                                         |
| Unit cell dimensions              | a = 12.6740(2) Å<br>b = 18.0944(3) Å<br>c = 21.0316(3) Å<br>β = 92.142(1)° |
| Volume                            | 4819.77(13) Å <sup>3</sup>                                                 |
| Z                                 | 8                                                                          |
| Density (calculated)              | 1.319 Mg/m <sup>3</sup>                                                    |
| Absorption coefficient            | 0.094 mm <sup>-1</sup>                                                     |
| F(000)                            | 2032                                                                       |
| Crystal size                      | 0.12 x 0.31 x 0.38 mm <sup>3</sup>                                         |
| Theta range for data collection   | 1.49 to 25.03°                                                             |
| Index ranges                      | -15 ≤ h ≤ 15, -21 ≤ k ≤ 21, -25 ≤ l ≤ 25                                   |
| Reflections collected             | 81260                                                                      |
| Independent reflections           | 8509 [R(int) = 0.045]                                                      |
| Completeness to theta = 25.03°    | 100.0 %                                                                    |
| Refinement method                 | Full-matrix least-squares on F <sup>2</sup>                                |
| Data / restraints / parameters    | 8509 / 0 / 641                                                             |
| Goodness-of-fit on F <sup>2</sup> | 1.045                                                                      |
| Final R indices [I > 2σ(I)]       | R1 = 0.0428, wR2 = 0.1012                                                  |
| R indices (all data)              | R1 = 0.0725, wR2 = 0.1140                                                  |
| Largest diff. peak and hole       | 0.250 and -0.185 e/Å <sup>3</sup>                                          |

**Table 2.** Atomic coordinates ( $\times 10^4$ ) and equivalent isotropic displacement parameters ( $\text{\AA}^2 \times 10^3$ ) for **1**.  $U(\text{eq})$  is defined as one third of the trace of the orthogonalized  $U^{\text{ij}}$  tensor.

|        | x       | y        | z        | U(eq) |
|--------|---------|----------|----------|-------|
| O(2)   | 4678(1) | 2397(1)  | 5109(1)  | 68(1) |
| O(3)   | 6513(1) | 2362(1)  | 5130(1)  | 70(1) |
| O(5)   | 6809(1) | 1838(1)  | 7364(1)  | 41(1) |
| O(7)   | 5739(1) | 594(1)   | 7645(1)  | 31(1) |
| O(9)   | 5203(1) | -1753(1) | 6708(1)  | 36(1) |
| O(10)  | 3186(1) | -1514(1) | 6449(1)  | 39(1) |
| O(12)  | 2775(1) | 1247(1)  | 7074(1)  | 38(1) |
| C(1)   | 4516(2) | 2033(1)  | 6234(1)  | 41(1) |
| C(1A)  | 5087(1) | 1882(1)  | 6804(1)  | 34(1) |
| C(2)   | 5064(2) | 2206(1)  | 5709(1)  | 48(1) |
| C(2A)  | 5581(2) | 2406(2)  | 4725(1)  | 78(1) |
| C(3)   | 6156(2) | 2205(1)  | 5726(1)  | 50(1) |
| C(4)   | 6741(2) | 2081(1)  | 6270(1)  | 47(1) |
| C(4A)  | 6187(1) | 1937(1)  | 6819(1)  | 38(1) |
| C(6)   | 6262(1) | 1786(1)  | 7948(1)  | 38(1) |
| C(6A)  | 5322(1) | 1294(1)  | 7867(1)  | 32(1) |
| C(7A)  | 5070(1) | 130(1)   | 7335(1)  | 27(1) |
| C(8)   | 5589(1) | -598(1)  | 7204(1)  | 27(1) |
| C(9)   | 4854(1) | -1147(1) | 6857(1)  | 29(1) |
| C(10)  | 3751(1) | -944(1)  | 6718(1)  | 31(1) |
| C(11)  | 3395(1) | -262(1)  | 6848(1)  | 30(1) |
| C(11A) | 4066(1) | 302(1)   | 7146(1)  | 28(1) |
| C(12)  | 3686(1) | 1060(1)  | 7204(1)  | 30(1) |
| C(12A) | 4527(1) | 1623(1)  | 7390(1)  | 32(1) |
| C(13)  | 2099(1) | -1382(1) | 6285(1)  | 44(1) |
| C(1')  | 6553(1) | -465(1)  | 6779(1)  | 32(1) |
| C(2')  | 6320(1) | -53(1)   | 6173(1)  | 36(1) |
| C(3')  | 6483(1) | -282(1)  | 5586(1)  | 40(1) |
| C(4')  | 6884(2) | -1038(1) | 5429(1)  | 54(1) |
| C(5')  | 6328(2) | 229(2)   | 5025(1)  | 65(1) |
| C(1'') | 5988(1) | -960(1)  | 7838(1)  | 32(1) |
| C(2'') | 5138(1) | -1049(1) | 8305(1)  | 32(1) |
| C(3'') | 5056(1) | -703(1)  | 8859(1)  | 36(1) |
| C(4'') | 4132(2) | -835(1)  | 9270(1)  | 49(1) |
| C(5'') | 5840(2) | -160(1)  | 9132(1)  | 53(1) |
| O(2B)  | 2051(1) | 1522(1)  | 11102(1) | 64(1) |
| O(3B)  | 564(1)  | 2226(1)  | 11245(1) | 66(1) |
| O(5B)  | 268(1)  | 2978(1)  | 9053(1)  | 42(1) |
| O(7B)  | 337(1)  | 1842(1)  | 8174(1)  | 35(1) |
| O(9B)  | -907(1) | -501(1)  | 7491(1)  | 39(1) |
| O(10B) | 886(1)  | -1165(1) | 7787(1)  | 42(1) |

|         |          |          |          |       |
|---------|----------|----------|----------|-------|
| O(12B)  | 3164(1)  | 955(1)   | 8760(1)  | 42(1) |
| C(1B)   | 2142(2)  | 1754(1)  | 9943(1)  | 41(1) |
| C(1C)   | 1639(1)  | 2117(1)  | 9422(1)  | 33(1) |
| C(2B)   | 1732(2)  | 1844(1)  | 10529(1) | 46(1) |
| C(2C)   | 1486(2)  | 1920(1)  | 11565(1) | 65(1) |
| C(3B)   | 848(2)   | 2268(1)  | 10616(1) | 47(1) |
| C(4B)   | 349(2)   | 2643(1)  | 10130(1) | 46(1) |
| C(4C)   | 779(2)   | 2571(1)  | 9528(1)  | 36(1) |
| C(6B)   | 808(2)   | 3052(1)  | 8472(1)  | 41(1) |
| C(6C)   | 1247(1)  | 2324(1)  | 8264(1)  | 35(1) |
| C(7C)   | 526(1)   | 1109(1)  | 8124(1)  | 29(1) |
| C(8B)   | -406(1)  | 705(1)   | 7837(1)  | 30(1) |
| C(9B)   | -201(1)  | -117(1)  | 7726(1)  | 31(1) |
| C(10B)  | 830(1)   | -427(1)  | 7920(1)  | 32(1) |
| C(11B)  | 1588(1)  | -4(1)    | 8194(1)  | 32(1) |
| C(11C)  | 1450(1)  | 782(1)   | 8306(1)  | 29(1) |
| C(12C)  | 2044(1)  | 2021(1)  | 8756(1)  | 33(1) |
| C(12B)  | 2297(1)  | 1216(1)  | 8612(1)  | 33(1) |
| C(13B)  | 1791(2)  | -1549(1) | 8041(1)  | 51(1) |
| C(1'B)  | -1356(1) | 773(1)   | 8283(1)  | 35(1) |
| C(2'B)  | -1213(1) | 402(1)   | 8915(1)  | 39(1) |
| C(3'B)  | -1405(1) | 680(1)   | 9481(1)  | 40(1) |
| C(4'B)  | -1792(2) | 1452(1)  | 9580(1)  | 66(1) |
| C(5'B)  | -1310(2) | 220(2)   | 10077(1) | 61(1) |
| C(1''B) | -726(1)  | 1050(1)  | 7179(1)  | 34(1) |
| C(2''B) | 142(1)   | 1007(1)  | 6718(1)  | 34(1) |
| C(3''B) | 145(2)   | 635(1)   | 6175(1)  | 38(1) |
| C(4''B) | 1082(2)  | 654(1)   | 5763(1)  | 49(1) |
| C(5''B) | -739(2)  | 164(2)   | 5920(1)  | 77(1) |



**Table 3.** Bond lengths [ $\text{\AA}$ ] and angles [ $^\circ$ ] for **1**.

|               |          |
|---------------|----------|
| O(2)-C(2)     | 1.381(2) |
| O(2)-C(2A)    | 1.425(3) |
| O(3)-C(3)     | 1.377(2) |
| O(3)-C(2A)    | 1.433(3) |
| O(5)-C(4A)    | 1.379(2) |
| O(5)-C(6)     | 1.434(2) |
| O(7)-C(7A)    | 1.344(2) |
| O(7)-C(6A)    | 1.457(2) |
| O(9)-C(9)     | 1.229(2) |
| O(10)-C(10)   | 1.367(2) |
| O(10)-C(13)   | 1.428(2) |
| O(12)-C(12)   | 1.224(2) |
| C(1)-C(2)     | 1.362(3) |
| C(1)-C(1A)    | 1.404(3) |
| C(1)-H(1)     | 0.9500   |
| C(1A)-C(4A)   | 1.398(2) |
| C(1A)-C(12A)  | 1.518(2) |
| C(2)-C(3)     | 1.384(3) |
| C(2A)-H(2A1)  | 0.9900   |
| C(2A)-H(2A2)  | 0.9900   |
| C(3)-C(4)     | 1.360(3) |
| C(4)-C(4A)    | 1.398(3) |
| C(4)-H(4)     | 0.9500   |
| C(6)-C(6A)    | 1.492(3) |
| C(6)-H(6A)    | 0.9900   |
| C(6)-H(6B)    | 0.9900   |
| C(6A)-C(12A)  | 1.518(2) |
| C(6A)-H(6A1)  | 1.0000   |
| C(7A)-C(11A)  | 1.356(2) |
| C(7A)-C(8)    | 1.503(2) |
| C(8)-C(9)     | 1.528(2) |
| C(8)-C(1')    | 1.552(2) |
| C(8)-C(1')    | 1.559(2) |
| C(9)-C(10)    | 1.465(2) |
| C(10)-C(11)   | 1.345(2) |
| C(11)-C(11A)  | 1.455(2) |
| C(11)-H(11)   | 0.9500   |
| C(11A)-C(12)  | 1.459(2) |
| C(12)-C(12A)  | 1.516(2) |
| C(12A)-H(12A) | 1.0000   |
| C(13)-H(13A)  | 0.9800   |
| C(13)-H(13B)  | 0.9800   |
| C(13)-H(13C)  | 0.9800   |
| C(1')-C(2')   | 1.496(2) |

|                |          |
|----------------|----------|
| C(1')-H(1'1)   | 0.9900   |
| C(1')-H(1'2)   | 0.9900   |
| C(2')-C(3')    | 1.327(2) |
| C(2')-H(2')    | 0.9500   |
| C(3')-C(4')    | 1.502(3) |
| C(3')-C(5')    | 1.505(3) |
| C(4')-H(4'1)   | 0.9800   |
| C(4')-H(4'2)   | 0.9800   |
| C(4')-H(4'3)   | 0.9800   |
| C(5')-H(5'1)   | 0.9800   |
| C(5')-H(5'2)   | 0.9800   |
| C(5')-H(5'3)   | 0.9800   |
| C(1'')-C(2'')  | 1.493(2) |
| C(1'')-H(1''1) | 0.9900   |
| C(1'')-H(1''2) | 0.9900   |
| C(2'')-C(3'')  | 1.331(2) |
| C(2'')-H(2'')  | 0.9500   |
| C(3'')-C(5'')  | 1.497(3) |
| C(3'')-C(4'')  | 1.500(3) |
| C(4'')-H(4''1) | 0.9800   |
| C(4'')-H(4''2) | 0.9800   |
| C(4'')-H(4''3) | 0.9800   |
| C(5'')-H(5''1) | 0.9800   |
| C(5'')-H(5''2) | 0.9800   |
| C(5'')-H(5''3) | 0.9800   |
| O(2B)-C(2B)    | 1.385(2) |
| O(2B)-C(2C)    | 1.426(3) |
| O(3B)-C(3B)    | 1.388(2) |
| O(3B)-C(2C)    | 1.436(3) |
| O(5B)-C(4C)    | 1.383(2) |
| O(5B)-C(6B)    | 1.430(2) |
| O(7B)-C(7C)    | 1.353(2) |
| O(7B)-C(6C)    | 1.452(2) |
| O(9B)-C(9B)    | 1.224(2) |
| O(10B)-C(10B)  | 1.367(2) |
| O(10B)-C(13B)  | 1.426(2) |
| O(12B)-C(12B)  | 1.225(2) |
| C(1B)-C(2B)    | 1.365(3) |
| C(1B)-C(1C)    | 1.410(3) |
| C(1B)-H(1B)    | 0.9500   |
| C(1C)-C(4C)    | 1.390(3) |
| C(1C)-C(12C)   | 1.519(2) |
| C(2B)-C(3B)    | 1.375(3) |
| C(2C)-H(2C1)   | 0.9900   |
| C(2C)-H(2C2)   | 0.9900   |
| C(3B)-C(4B)    | 1.362(3) |

|               |          |
|---------------|----------|
| C(4B)-C(4C)   | 1.403(3) |
| C(4B)-H(4B)   | 0.9500   |
| C(6B)-C(6C)   | 1.502(3) |
| C(6B)-H(6B1)  | 0.9900   |
| C(6B)-H(6B2)  | 0.9900   |
| C(6C)-C(12C)  | 1.520(2) |
| C(6C)-H(6C)   | 1.0000   |
| C(7C)-C(11C)  | 1.354(2) |
| C(7C)-C(8B)   | 1.497(2) |
| C(8B)-C(9B)   | 1.529(3) |
| C(8B)-C(1"B)  | 1.557(2) |
| C(8B)-C(1'B)  | 1.558(2) |
| C(9B)-C(10B)  | 1.466(2) |
| C(10B)-C(11B) | 1.342(2) |
| C(11B)-C(11C) | 1.453(3) |
| C(11B)-H(11B) | 0.9500   |
| C(11C)-C(12B) | 1.460(2) |
| C(12C)-C(12B) | 1.525(3) |
| C(12C)-H(12C) | 1.0000   |
| C(13B)-H(13D) | 0.9800   |
| C(13B)-H(13E) | 0.9800   |
| C(13B)-H(13F) | 0.9800   |
| C(1'B)-C(2'B) | 1.494(3) |
| C(1'B)-H(1'3) | 0.9900   |
| C(1'B)-H(1'4) | 0.9900   |
| C(2'B)-C(3'B) | 1.323(2) |
| C(2'B)-H(2'B) | 0.9500   |
| C(3'B)-C(4'B) | 1.498(3) |
| C(3'B)-C(5'B) | 1.505(3) |
| C(4'B)-H(4'4) | 0.9800   |
| C(4'B)-H(4'5) | 0.9800   |
| C(4'B)-H(4'6) | 0.9800   |
| C(5'B)-H(5'4) | 0.9800   |
| C(5'B)-H(5'5) | 0.9800   |
| C(5'B)-H(5'6) | 0.9800   |
| C(1"B)-C(2"B) | 1.495(2) |
| C(1"B)-H(1"3) | 0.9900   |
| C(1"B)-H(1"4) | 0.9900   |
| C(2"B)-C(3"B) | 1.327(2) |
| C(2"B)-H(2"B) | 0.9500   |
| C(3"B)-C(5"B) | 1.491(3) |
| C(3"B)-C(4"B) | 1.496(3) |
| C(4"B)-H(4"4) | 0.9800   |
| C(4"B)-H(4"5) | 0.9800   |
| C(4"B)-H(4"6) | 0.9800   |
| C(5"B)-H(5"4) | 0.9800   |

|                     |            |
|---------------------|------------|
| C(5"B)-H(5"5)       | 0.9800     |
| C(5"B)-H(5"6)       | 0.9800     |
| C(2)-O(2)-C(2A)     | 104.88(18) |
| C(3)-O(3)-C(2A)     | 105.09(17) |
| C(4A)-O(5)-C(6)     | 116.10(14) |
| C(7A)-O(7)-C(6A)    | 117.95(12) |
| C(10)-O(10)-C(13)   | 117.31(14) |
| C(2)-C(1)-C(1A)     | 118.32(18) |
| C(2)-C(1)-H(1)      | 120.8      |
| C(1A)-C(1)-H(1)     | 120.8      |
| C(4A)-C(1A)-C(1)    | 119.19(17) |
| C(4A)-C(1A)-C(12A)  | 119.99(17) |
| C(1)-C(1A)-C(12A)   | 120.74(16) |
| C(1)-C(2)-O(2)      | 128.6(2)   |
| C(1)-C(2)-C(3)      | 121.3(2)   |
| O(2)-C(2)-C(3)      | 110.03(18) |
| O(2)-C(2A)-O(3)     | 108.92(18) |
| O(2)-C(2A)-H(2A1)   | 109.9      |
| O(3)-C(2A)-H(2A1)   | 109.9      |
| O(2)-C(2A)-H(2A2)   | 109.9      |
| O(3)-C(2A)-H(2A2)   | 109.9      |
| H(2A1)-C(2A)-H(2A2) | 108.3      |
| C(4)-C(3)-O(3)      | 127.8(2)   |
| C(4)-C(3)-C(2)      | 122.34(19) |
| O(3)-C(3)-C(2)      | 109.9(2)   |
| C(3)-C(4)-C(4A)     | 116.81(19) |
| C(3)-C(4)-H(4)      | 121.6      |
| C(4A)-C(4)-H(4)     | 121.6      |
| O(5)-C(4A)-C(1A)    | 123.29(17) |
| O(5)-C(4A)-C(4)     | 114.93(17) |
| C(1A)-C(4A)-C(4)    | 121.76(19) |
| O(5)-C(6)-C(6A)     | 110.58(14) |
| O(5)-C(6)-H(6A)     | 109.5      |
| C(6A)-C(6)-H(6A)    | 109.5      |
| O(5)-C(6)-H(6B)     | 109.5      |
| C(6A)-C(6)-H(6B)    | 109.5      |
| H(6A)-C(6)-H(6B)    | 108.1      |
| O(7)-C(6A)-C(6)     | 104.93(13) |
| O(7)-C(6A)-C(12A)   | 111.67(14) |
| C(6)-C(6A)-C(12A)   | 110.42(16) |
| O(7)-C(6A)-H(6A1)   | 109.9      |
| C(6)-C(6A)-H(6A1)   | 109.9      |
| C(12A)-C(6A)-H(6A1) | 109.9      |
| O(7)-C(7A)-C(11A)   | 124.56(15) |
| O(7)-C(7A)-C(8)     | 111.29(14) |

|                     |            |
|---------------------|------------|
| C(11A)-C(7A)-C(8)   | 124.12(15) |
| C(7A)-C(8)-C(9)     | 113.14(14) |
| C(7A)-C(8)-C(1'')   | 110.14(13) |
| C(9)-C(8)-C(1'')    | 108.05(13) |
| C(7A)-C(8)-C(1')    | 109.05(14) |
| C(9)-C(8)-C(1')     | 107.61(13) |
| C(1'')-C(8)-C(1')   | 108.74(13) |
| O(9)-C(9)-C(10)     | 121.51(16) |
| O(9)-C(9)-C(8)      | 118.92(15) |
| C(10)-C(9)-C(8)     | 119.57(15) |
| C(11)-C(10)-O(10)   | 127.07(16) |
| C(11)-C(10)-C(9)    | 120.93(16) |
| O(10)-C(10)-C(9)    | 112.00(15) |
| C(10)-C(11)-C(11A)  | 122.43(16) |
| C(10)-C(11)-H(11)   | 118.8      |
| C(11A)-C(11)-H(11)  | 118.8      |
| C(7A)-C(11A)-C(11)  | 119.46(16) |
| C(7A)-C(11A)-C(12)  | 120.03(16) |
| C(11)-C(11A)-C(12)  | 120.38(15) |
| O(12)-C(12)-C(11A)  | 123.58(16) |
| O(12)-C(12)-C(12A)  | 121.26(16) |
| C(11A)-C(12)-C(12A) | 114.99(15) |
| C(12)-C(12A)-C(6A)  | 110.48(15) |
| C(12)-C(12A)-C(1A)  | 110.08(14) |
| C(6A)-C(12A)-C(1A)  | 109.80(14) |
| C(12)-C(12A)-H(12A) | 108.8      |
| C(6A)-C(12A)-H(12A) | 108.8      |
| C(1A)-C(12A)-H(12A) | 108.8      |
| O(10)-C(13)-H(13A)  | 109.5      |
| O(10)-C(13)-H(13B)  | 109.5      |
| H(13A)-C(13)-H(13B) | 109.5      |
| O(10)-C(13)-H(13C)  | 109.5      |
| H(13A)-C(13)-H(13C) | 109.5      |
| H(13B)-C(13)-H(13C) | 109.5      |
| C(2')-C(1')-C(8)    | 115.63(14) |
| C(2')-C(1')-H(1'1)  | 108.4      |
| C(8)-C(1')-H(1'1)   | 108.4      |
| C(2')-C(1')-H(1'2)  | 108.4      |
| C(8)-C(1')-H(1'2)   | 108.4      |
| H(1'1)-C(1')-H(1'2) | 107.4      |
| C(3')-C(2')-C(1')   | 127.28(17) |
| C(3')-C(2')-H(2')   | 116.4      |
| C(1')-C(2')-H(2')   | 116.4      |
| C(2')-C(3')-C(4')   | 123.69(18) |
| C(2')-C(3')-C(5')   | 121.24(19) |
| C(4')-C(3')-C(5')   | 114.99(18) |

|                        |            |
|------------------------|------------|
| C(3')-C(4')-H(4'1)     | 109.5      |
| C(3')-C(4')-H(4'2)     | 109.5      |
| H(4'1)-C(4')-H(4'2)    | 109.5      |
| C(3')-C(4')-H(4'3)     | 109.5      |
| H(4'1)-C(4')-H(4'3)    | 109.5      |
| H(4'2)-C(4')-H(4'3)    | 109.5      |
| C(3')-C(5')-H(5'1)     | 109.5      |
| C(3')-C(5')-H(5'2)     | 109.5      |
| H(5'1)-C(5')-H(5'2)    | 109.5      |
| C(3')-C(5')-H(5'3)     | 109.5      |
| H(5'1)-C(5')-H(5'3)    | 109.5      |
| H(5'2)-C(5')-H(5'3)    | 109.5      |
| C(2'')-C(1'')-C(8)     | 112.97(14) |
| C(2'')-C(1'')-H(1''1)  | 109.0      |
| C(8)-C(1'')-H(1''1)    | 109.0      |
| C(2'')-C(1'')-H(1''2)  | 109.0      |
| C(8)-C(1'')-H(1''2)    | 109.0      |
| H(1''1)-C(1'')-H(1''2) | 107.8      |
| C(3'')-C(2'')-C(1'')   | 127.39(17) |
| C(3'')-C(2'')-H(2'')   | 116.3      |
| C(1'')-C(2'')-H(2'')   | 116.3      |
| C(2'')-C(3'')-C(5'')   | 124.91(17) |
| C(2'')-C(3'')-C(4'')   | 121.22(18) |
| C(5'')-C(3'')-C(4'')   | 113.87(16) |
| C(3'')-C(4'')-H(4''1)  | 109.5      |
| C(3'')-C(4'')-H(4''2)  | 109.5      |
| H(4''1)-C(4'')-H(4''2) | 109.5      |
| C(3'')-C(4'')-H(4''3)  | 109.5      |
| H(4''1)-C(4'')-H(4''3) | 109.5      |
| H(4''2)-C(4'')-H(4''3) | 109.5      |
| C(3'')-C(5'')-H(5''1)  | 109.5      |
| C(3'')-C(5'')-H(5''2)  | 109.5      |
| H(5''1)-C(5'')-H(5''2) | 109.5      |
| C(3'')-C(5'')-H(5''3)  | 109.5      |
| H(5''1)-C(5'')-H(5''3) | 109.5      |
| H(5''2)-C(5'')-H(5''3) | 109.5      |
| C(2B)-O(2B)-C(2C)      | 104.11(16) |
| C(3B)-O(3B)-C(2C)      | 103.41(17) |
| C(4C)-O(5B)-C(6B)      | 116.21(14) |
| C(7C)-O(7B)-C(6C)      | 117.18(13) |
| C(10B)-O(10B)-C(13B)   | 116.49(14) |
| C(2B)-C(1B)-C(1C)      | 118.09(18) |
| C(2B)-C(1B)-H(1B)      | 121.0      |
| C(1C)-C(1B)-H(1B)      | 121.0      |
| C(4C)-C(1C)-C(1B)      | 118.95(17) |
| C(4C)-C(1C)-C(12C)     | 120.64(16) |

|                      |            |
|----------------------|------------|
| C(1B)-C(1C)-C(12C)   | 120.41(16) |
| C(1B)-C(2B)-C(3B)    | 121.70(19) |
| C(1B)-C(2B)-O(2B)    | 128.8(2)   |
| C(3B)-C(2B)-O(2B)    | 109.42(18) |
| O(2B)-C(2C)-O(3B)    | 107.18(16) |
| O(2B)-C(2C)-H(2C1)   | 110.3      |
| O(3B)-C(2C)-H(2C1)   | 110.3      |
| O(2B)-C(2C)-H(2C2)   | 110.3      |
| O(3B)-C(2C)-H(2C2)   | 110.3      |
| H(2C1)-C(2C)-H(2C2)  | 108.5      |
| C(4B)-C(3B)-C(2B)    | 122.45(18) |
| C(4B)-C(3B)-O(3B)    | 127.8(2)   |
| C(2B)-C(3B)-O(3B)    | 109.72(19) |
| C(3B)-C(4B)-C(4C)    | 116.45(18) |
| C(3B)-C(4B)-H(4B)    | 121.8      |
| C(4C)-C(4B)-H(4B)    | 121.8      |
| O(5B)-C(4C)-C(1C)    | 123.19(16) |
| O(5B)-C(4C)-C(4B)    | 114.57(16) |
| C(1C)-C(4C)-C(4B)    | 122.24(18) |
| O(5B)-C(6B)-C(6C)    | 111.05(15) |
| O(5B)-C(6B)-H(6B1)   | 109.4      |
| C(6C)-C(6B)-H(6B1)   | 109.4      |
| O(5B)-C(6B)-H(6B2)   | 109.4      |
| C(6C)-C(6B)-H(6B2)   | 109.4      |
| H(6B1)-C(6B)-H(6B2)  | 108.0      |
| O(7B)-C(6C)-C(6B)    | 105.33(14) |
| O(7B)-C(6C)-C(12C)   | 112.11(14) |
| C(6B)-C(6C)-C(12C)   | 111.25(15) |
| O(7B)-C(6C)-H(6C)    | 109.4      |
| C(6B)-C(6C)-H(6C)    | 109.4      |
| C(12C)-C(6C)-H(6C)   | 109.4      |
| O(7B)-C(7C)-C(11C)   | 124.07(16) |
| O(7B)-C(7C)-C(8B)    | 111.76(14) |
| C(11C)-C(7C)-C(8B)   | 124.17(16) |
| C(7C)-C(8B)-C(9B)    | 113.55(14) |
| C(7C)-C(8B)-C(1"B)   | 109.78(14) |
| C(9B)-C(8B)-C(1"B)   | 107.15(14) |
| C(7C)-C(8B)-C(1'B)   | 109.50(14) |
| C(9B)-C(8B)-C(1'B)   | 107.94(14) |
| C(1"B)-C(8B)-C(1'B)  | 108.81(13) |
| O(9B)-C(9B)-C(10B)   | 121.67(17) |
| O(9B)-C(9B)-C(8B)    | 119.22(16) |
| C(10B)-C(9B)-C(8B)   | 119.09(16) |
| C(11B)-C(10B)-O(10B) | 127.14(16) |
| C(11B)-C(10B)-C(9B)  | 121.07(16) |
| O(10B)-C(10B)-C(9B)  | 111.79(15) |

|                       |            |
|-----------------------|------------|
| C(10B)-C(11B)-C(11C)  | 122.67(16) |
| C(10B)-C(11B)-H(11B)  | 118.7      |
| C(11C)-C(11B)-H(11B)  | 118.7      |
| C(7C)-C(11C)-C(11B)   | 119.36(16) |
| C(7C)-C(11C)-C(12B)   | 120.26(16) |
| C(11B)-C(11C)-C(12B)  | 120.38(15) |
| C(1C)-C(12C)-C(6C)    | 110.32(14) |
| C(1C)-C(12C)-C(12B)   | 111.89(14) |
| C(6C)-C(12C)-C(12B)   | 110.44(15) |
| C(1C)-C(12C)-H(12C)   | 108.0      |
| C(6C)-C(12C)-H(12C)   | 108.0      |
| C(12B)-C(12C)-H(12C)  | 108.0      |
| O(12B)-C(12B)-C(11C)  | 122.87(17) |
| O(12B)-C(12B)-C(12C)  | 120.78(16) |
| C(11C)-C(12B)-C(12C)  | 116.33(15) |
| O(10B)-C(13B)-H(13D)  | 109.5      |
| O(10B)-C(13B)-H(13E)  | 109.5      |
| H(13D)-C(13B)-H(13E)  | 109.5      |
| O(10B)-C(13B)-H(13F)  | 109.5      |
| H(13D)-C(13B)-H(13F)  | 109.5      |
| H(13E)-C(13B)-H(13F)  | 109.5      |
| C(2'B)-C(1'B)-C(8B)   | 115.45(14) |
| C(2'B)-C(1'B)-H(1'3)  | 108.4      |
| C(8B)-C(1'B)-H(1'3)   | 108.4      |
| C(2'B)-C(1'B)-H(1'4)  | 108.4      |
| C(8B)-C(1'B)-H(1'4)   | 108.4      |
| H(1'3)-C(1'B)-H(1'4)  | 107.5      |
| C(3'B)-C(2'B)-C(1'B)  | 127.57(18) |
| C(3'B)-C(2'B)-H(2'B)  | 116.2      |
| C(1'B)-C(2'B)-H(2'B)  | 116.2      |
| C(2'B)-C(3'B)-C(4'B)  | 123.47(19) |
| C(2'B)-C(3'B)-C(5'B)  | 121.82(19) |
| C(4'B)-C(3'B)-C(5'B)  | 114.61(18) |
| C(3'B)-C(4'B)-H(4'4)  | 109.5      |
| C(3'B)-C(4'B)-H(4'5)  | 109.5      |
| H(4'4)-C(4'B)-H(4'5)  | 109.5      |
| C(3'B)-C(4'B)-H(4'6)  | 109.5      |
| H(4'4)-C(4'B)-H(4'6)  | 109.5      |
| H(4'5)-C(4'B)-H(4'6)  | 109.5      |
| C(3'B)-C(5'B)-H(5'4)  | 109.5      |
| C(3'B)-C(5'B)-H(5'5)  | 109.5      |
| H(5'4)-C(5'B)-H(5'5)  | 109.5      |
| C(3'B)-C(5'B)-H(5'6)  | 109.5      |
| H(5'4)-C(5'B)-H(5'6)  | 109.5      |
| H(5'5)-C(5'B)-H(5'6)  | 109.5      |
| C(2''B)-C(1''B)-C(8B) | 112.45(14) |



|                      |            |
|----------------------|------------|
| C(2"B)-C(1"B)-H(1"3) | 109.1      |
| C(8B)-C(1"B)-H(1"3)  | 109.1      |
| C(2"B)-C(1"B)-H(1"4) | 109.1      |
| C(8B)-C(1"B)-H(1"4)  | 109.1      |
| H(1"3)-C(1"B)-H(1"4) | 107.8      |
| C(3"B)-C(2"B)-C(1"B) | 127.65(17) |
| C(3"B)-C(2"B)-H(2"B) | 116.2      |
| C(1"B)-C(2"B)-H(2"B) | 116.2      |
| C(2"B)-C(3"B)-C(5"B) | 124.96(18) |
| C(2"B)-C(3"B)-C(4"B) | 121.00(18) |
| C(5"B)-C(3"B)-C(4"B) | 114.03(17) |
| C(3"B)-C(4"B)-H(4"4) | 109.5      |
| C(3"B)-C(4"B)-H(4"5) | 109.5      |
| H(4"4)-C(4"B)-H(4"5) | 109.5      |
| C(3"B)-C(4"B)-H(4"6) | 109.5      |
| H(4"4)-C(4"B)-H(4"6) | 109.5      |
| H(4"5)-C(4"B)-H(4"6) | 109.5      |
| C(3"B)-C(5"B)-H(5"4) | 109.5      |
| C(3"B)-C(5"B)-H(5"5) | 109.5      |
| H(5"4)-C(5"B)-H(5"5) | 109.5      |
| C(3"B)-C(5"B)-H(5"6) | 109.5      |
| H(5"4)-C(5"B)-H(5"6) | 109.5      |

**Table 4.** Anisotropic displacement parameters ( $\text{\AA}^2 \times 10^3$ ) for **1**. The anisotropic displacement factor exponent takes the form:  $-2\pi^2 [h^2 a^{*2} U^{11} + \dots + 2 h k a^* b^* U^{12}]$ .

|        | U11    | U22   | U33   | U23    | U13    | U12    |
|--------|--------|-------|-------|--------|--------|--------|
| O(2)   | 78(1)  | 83(1) | 44(1) | 11(1)  | -2(1)  | -29(1) |
| O(3)   | 78(1)  | 82(1) | 51(1) | -3(1)  | 15(1)  | -36(1) |
| O(5)   | 29(1)  | 38(1) | 56(1) | -4(1)  | -3(1)  | -4(1)  |
| O(7)   | 27(1)  | 28(1) | 38(1) | -8(1)  | -4(1)  | 2(1)   |
| O(9)   | 39(1)  | 29(1) | 40(1) | -4(1)  | 1(1)   | -1(1)  |
| O(10)  | 35(1)  | 33(1) | 49(1) | -4(1)  | -8(1)  | -7(1)  |
| O(12)  | 25(1)  | 41(1) | 49(1) | 1(1)   | -2(1)  | 4(1)   |
| C(1)   | 40(1)  | 39(1) | 44(1) | 0(1)   | -1(1)  | -9(1)  |
| C(1A)  | 33(1)  | 26(1) | 42(1) | -4(1)  | 0(1)   | -4(1)  |
| C(2)   | 58(1)  | 46(1) | 39(1) | 1(1)   | -5(1)  | -16(1) |
| C(2A)  | 97(2)  | 94(2) | 45(2) | -2(1)  | 9(2)   | -30(2) |
| C(3)   | 58(1)  | 47(1) | 46(1) | -4(1)  | 16(1)  | -22(1) |
| C(4)   | 38(1)  | 43(1) | 59(1) | -11(1) | 6(1)   | -16(1) |
| C(4A)  | 36(1)  | 28(1) | 49(1) | -6(1)  | 1(1)   | -5(1)  |
| C(6)   | 35(1)  | 34(1) | 45(1) | -11(1) | -4(1)  | 6(1)   |
| C(6A)  | 30(1)  | 30(1) | 38(1) | -9(1)  | 0(1)   | 6(1)   |
| C(7A)  | 29(1)  | 29(1) | 24(1) | -1(1)  | 1(1)   | -5(1)  |
| C(8)   | 25(1)  | 27(1) | 30(1) | -1(1)  | 1(1)   | 2(1)   |
| C(9)   | 34(1)  | 29(1) | 24(1) | 1(1)   | 5(1)   | -2(1)  |
| C(10)  | 32(1)  | 30(1) | 29(1) | 0(1)   | -1(1)  | -6(1)  |
| C(11)  | 24(1)  | 35(1) | 31(1) | 2(1)   | -1(1)  | -4(1)  |
| C(11A) | 25(1)  | 29(1) | 29(1) | 0(1)   | 2(1)   | 1(1)   |
| C(12)  | 27(1)  | 36(1) | 27(1) | 0(1)   | 1(1)   | 1(1)   |
| C(12A) | 27(1)  | 29(1) | 39(1) | -7(1)  | 0(1)   | 4(1)   |
| C(13)  | 33(1)  | 46(1) | 53(1) | -3(1)  | -10(1) | -8(1)  |
| C(1')  | 27(1)  | 34(1) | 35(1) | -4(1)  | 3(1)   | -2(1)  |
| C(2')  | 34(1)  | 33(1) | 41(1) | 2(1)   | 10(1)  | 2(1)   |
| C(3')  | 32(1)  | 50(1) | 38(1) | 4(1)   | 8(1)   | -4(1)  |
| C(4')  | 66(2)  | 55(1) | 42(1) | -13(1) | 13(1)  | -12(1) |
| C(5')  | 57(1)  | 90(2) | 48(1) | 20(1)  | 15(1)  | 6(1)   |
| C(1'') | 36(1)  | 29(1) | 30(1) | -2(1)  | -3(1)  | 5(1)   |
| C(2'') | 35(1)  | 29(1) | 32(1) | 2(1)   | -2(1)  | 1(1)   |
| C(3'') | 40(1)  | 35(1) | 32(1) | 1(1)   | -2(1)  | 5(1)   |
| C(4'') | 57(1)  | 54(1) | 37(1) | 0(1)   | 9(1)   | 1(1)   |
| C(5'') | 63(1)  | 57(1) | 39(1) | -12(1) | -1(1)  | -6(1)  |
| O(2B)  | 107(1) | 55(1) | 30(1) | 1(1)   | -6(1)  | 13(1)  |
| O(3B)  | 102(1) | 59(1) | 38(1) | -4(1)  | 21(1)  | 3(1)   |
| O(5B)  | 44(1)  | 40(1) | 42(1) | 0(1)   | 1(1)   | 10(1)  |
| O(7B)  | 34(1)  | 32(1) | 40(1) | -1(1)  | -4(1)  | 2(1)   |
| O(9B)  | 36(1)  | 39(1) | 42(1) | -4(1)  | -3(1)  | 0(1)   |
| O(10B) | 43(1)  | 33(1) | 48(1) | -6(1)  | -6(1)  | 9(1)   |

|         |        |        |       |        |        |        |
|---------|--------|--------|-------|--------|--------|--------|
| O(12B)  | 30(1)  | 49(1)  | 48(1) | -5(1)  | -4(1)  | 6(1)   |
| C(1B)   | 47(1)  | 37(1)  | 39(1) | -2(1)  | -6(1)  | 4(1)   |
| C(1C)   | 35(1)  | 31(1)  | 34(1) | -2(1)  | -1(1)  | -3(1)  |
| C(2B)   | 68(2)  | 38(1)  | 32(1) | -1(1)  | -4(1)  | 1(1)   |
| C(2C)   | 109(2) | 53(2)  | 34(1) | 1(1)   | 2(1)   | -2(1)  |
| C(3B)   | 70(2)  | 38(1)  | 34(1) | -6(1)  | 11(1)  | -6(1)  |
| C(4B)   | 50(1)  | 42(1)  | 45(1) | -7(1)  | 9(1)   | 6(1)   |
| C(4C)   | 40(1)  | 31(1)  | 38(1) | 0(1)   | -2(1)  | -1(1)  |
| C(6B)   | 44(1)  | 35(1)  | 42(1) | 6(1)   | -1(1)  | -3(1)  |
| C(6C)   | 36(1)  | 36(1)  | 34(1) | 4(1)   | 0(1)   | -3(1)  |
| C(7C)   | 32(1)  | 30(1)  | 25(1) | 1(1)   | 4(1)   | 5(1)   |
| C(8B)   | 27(1)  | 33(1)  | 29(1) | -2(1)  | -1(1)  | 5(1)   |
| C(9B)   | 30(1)  | 37(1)  | 25(1) | 1(1)   | 3(1)   | -1(1)  |
| C(10B)  | 35(1)  | 34(1)  | 27(1) | -3(1)  | 3(1)   | 5(1)   |
| C(11B)  | 30(1)  | 38(1)  | 29(1) | 2(1)   | 2(1)   | 9(1)   |
| C(11C)  | 28(1)  | 35(1)  | 25(1) | -1(1)  | 2(1)   | 3(1)   |
| C(12C)  | 30(1)  | 34(1)  | 35(1) | 0(1)   | 1(1)   | -4(1)  |
| C(12B)  | 29(1)  | 42(1)  | 27(1) | 2(1)   | 4(1)   | 2(1)   |
| C(13B)  | 57(1)  | 35(1)  | 60(1) | -4(1)  | -10(1) | 16(1)  |
| C(1'B)  | 28(1)  | 41(1)  | 38(1) | -6(1)  | 2(1)   | 4(1)   |
| C(2'B)  | 38(1)  | 41(1)  | 39(1) | 1(1)   | 11(1)  | 7(1)   |
| C(3'B)  | 28(1)  | 54(1)  | 39(1) | -3(1)  | 7(1)   | 0(1)   |
| C(4'B)  | 83(2)  | 63(2)  | 52(1) | -15(1) | 13(1)  | 6(1)   |
| C(5'B)  | 53(1)  | 90(2)  | 41(1) | 10(1)  | 15(1)  | 8(1)   |
| C(1''B) | 33(1)  | 37(1)  | 32(1) | -1(1)  | -2(1)  | 5(1)   |
| C(2''B) | 33(1)  | 36(1)  | 32(1) | 3(1)   | -2(1)  | -2(1)  |
| C(3''B) | 40(1)  | 41(1)  | 33(1) | 1(1)   | 0(1)   | 1(1)   |
| C(4''B) | 53(1)  | 57(1)  | 39(1) | 4(1)   | 7(1)   | 12(1)  |
| C(5''B) | 76(2)  | 102(2) | 51(2) | -30(1) | 10(1)  | -35(2) |

**Table 5.** Calculated hydrogen coordinates (  $\times 10^4$ ) and isotropic displacement parameters ( $\text{\AA}^2 \times 10^3$ ) for **1**.

|         | x    | y     | z     | U(eq) |
|---------|------|-------|-------|-------|
| H(1)    | 3766 | 2015  | 6215  | 49    |
| H(2A1)  | 5590 | 2867  | 4472  | 94    |
| H(2A2)  | 5555 | 1982  | 4427  | 94    |
| H(4)    | 7491 | 2092  | 6277  | 56    |
| H(6A)   | 6034 | 2285  | 8079  | 46    |
| H(6B)   | 6745 | 1587  | 8287  | 46    |
| H(6A1)  | 4988 | 1222  | 8286  | 39    |
| H(11)   | 2680 | -145  | 6741  | 36    |
| H(12A)  | 4181 | 2058  | 7589  | 38    |
| H(13A)  | 1738 | -1212 | 6662  | 66    |
| H(13B)  | 1770 | -1841 | 6128  | 66    |
| H(13C)  | 2042 | -1003 | 5953  | 66    |
| H(1'1)  | 7097 | -188  | 7031  | 38    |
| H(1'2)  | 6859 | -951  | 6672  | 38    |
| H(2')   | 6023 | 426   | 6214  | 43    |
| H(4'1)  | 7647 | -1015 | 5369  | 81    |
| H(4'2)  | 6526 | -1216 | 5036  | 81    |
| H(4'3)  | 6742 | -1378 | 5778  | 81    |
| H(5'1)  | 6006 | 691   | 5164  | 97    |
| H(5'2)  | 5865 | -7    | 4701  | 97    |
| H(5'3)  | 7014 | 335   | 4844  | 97    |
| H(1''1) | 6290 | -1451 | 7746  | 38    |
| H(1''2) | 6560 | -651  | 8032  | 38    |
| H(2'')  | 4594 | -1392 | 8193  | 38    |
| H(4''1) | 3677 | -1218 | 9077  | 73    |
| H(4''2) | 3729 | -376  | 9309  | 73    |
| H(4''3) | 4386 | -997  | 9693  | 73    |
| H(5''1) | 6410 | -91   | 8836  | 79    |
| H(5''2) | 6134 | -346  | 9539  | 79    |
| H(5''3) | 5488 | 315   | 9201  | 79    |
| H(1B)   | 2748 | 1455  | 9889  | 49    |
| H(2C1)  | 1932 | 2319  | 11752 | 78    |
| H(2C2)  | 1279 | 1585  | 11911 | 78    |
| H(4B)   | -257 | 2938  | 10196 | 55    |
| H(6B1)  | 1392 | 3413  | 8532  | 49    |
| H(6B2)  | 314  | 3245  | 8136  | 49    |
| H(6C)   | 1595 | 2388  | 7849  | 42    |
| H(11B)  | 2241 | -227  | 8320  | 39    |
| H(12C)  | 2710 | 2313  | 8727  | 40    |
| H(13D)  | 2431 | -1327 | 7876  | 76    |
| H(13E)  | 1751 | -2069 | 7915  | 76    |

|        |       |       |       |     |
|--------|-------|-------|-------|-----|
| H(13F) | 1813  | -1513 | 8506  | 76  |
| H(1'3) | -1496 | 1304  | 8355  | 43  |
| H(1'4) | -1989 | 562   | 8061  | 43  |
| H(2'B) | -953  | -90   | 8910  | 47  |
| H(4'4) | -1642 | 1753  | 9207  | 99  |
| H(4'5) | -1432 | 1664  | 9958  | 99  |
| H(4'6) | -2555 | 1444  | 9640  | 99  |
| H(5'4) | -1032 | -270  | 9974  | 91  |
| H(5'5) | -2007 | 166   | 10258 | 91  |
| H(5'6) | -829  | 463   | 10387 | 91  |
| H(1"3) | -1354 | 788   | 6999  | 41  |
| H(1"4) | -922  | 1574  | 7240  | 41  |
| H(2"B) | 764   | 1279  | 6827  | 40  |
| H(4"4) | 1640  | 954   | 5969  | 74  |
| H(4"5) | 877   | 871   | 5350  | 74  |
| H(4"6) | 1341  | 150   | 5701  | 74  |
| H(5"4) | -1276 | 117   | 6242  | 115 |
| H(5"5) | -468  | -327  | 5816  | 115 |
| H(5"6) | -1055 | 393   | 5536  | 115 |

## S6. Isolation of known compounds 4-14.

A precipitate, rotenone (**4**, 1.2 g) was obtained in pure form in Fr. 1.4 and a further impure precipitate in Fr. 1.3. Fr. 1.3 precipitate (17.6 mg) was purified using HPLC preparative RP-18 column with CH<sub>3</sub>CN-H<sub>2</sub>O (65:35) as solvent system to afford 6a,12a-dehydrodeguelin (**5**, 5.5 mg) and 11-hydroxy-6a,12a-dehydrodeguelin (**6**, 1.4 mg). Fr. 1.4 soluble fraction (6.3 g) was chromatographed over a silica gel column with hexanes/acetone (10:1 to 1:1) solvent mixtures to yield seven subfractions (Fr. 2.1-2.7) and a precipitate in pure form in Fr. 2.2 corresponding to additional amounts of **4** (219.0 mg). Fr. 2.2 soluble fraction (1.1 g) was chromatographed over a Sephadex LH-20 column using MeOH-H<sub>2</sub>O (9:1) as solvent system to afford four subfractions (Fr. 3.1-3.4). Fr. 2.3 (3.1 g) was chromatographed on a silica gel column using hexanes-acetone (10:1 to 0:1) as solvent system to give ten subfractions (Fr. 4.1-4.10). Fr. 4.4 (509.1 mg) was purified by preparative RP-18 HPLC using CH<sub>3</sub>CN-H<sub>2</sub>O (65:35) as solvent mixtures to yield *cis*-(6a $\beta$ ,12a $\beta$ )-hydroxyrotenone (**7**, 12.8 mg) and tephrosin (**8**, 54.7 mg). A fraction (49.6 mg) collected during the previous HPLC isolation experiment was further purified in a separate semipreparative RP-18 HPLC experiment using MeOH-H<sub>2</sub>O (55:45) to afford additional amounts of **4** (5.3 mg) and 11-hydroxytephrosin (**9**, 1.3 mg). Fr. 3.3 (477.7 mg) was subjected to RP-18 HPLC using gradient solvent systems consisting of CH<sub>3</sub>CN-H<sub>2</sub>O (45:55 for 20 min., then 31:69 for 50 min.) to afford five subfractions (Fr. 5.1-5.5). Fr. 5.2 (3.1 mg) was purified by Sephadex LH-20 using MeOH as solvent to yield 12a-hydroxyisomillettone (**10**, 2.9 mg). Fr. 5.3 (7.4 mg) was further purified in a semipreparative RP-18 HPLC experiment using MeOH-H<sub>2</sub>O (50:50) as solvent mixtures to afford further amounts of **10** (1.4 mg) and millettosin (**11**, 2.6 mg). Fr. 5.5 (34.7 mg) was purified by RP-18 HPLC using CH<sub>3</sub>CN-H<sub>2</sub>O (33:67) as solvent system to yield deguelin (**12**, 7.3 mg). Fr. 1.5 (1.7 g) was chromatographed over a silica gel column using

CHCl<sub>3</sub>-acetone in a gradient solvent system to afford five subfractions (Fr. 6.1-.6.5). Fr. 6.2 (755.5 mg) was further chromatographed on a Sephadex LH-20 column using MeOH-H<sub>2</sub>O (1:1) as solvent system to give four subfractions (Fr. 7.1-7.4). Fr. 7.2 (234.1 mg) was purified by preparative RP-18 HPLC using MeOH-H<sub>2</sub>O in a gradient fashion (55:45 for 25 min., then 47:53 for 69 min.) as solvent system to give 12a-hydroxyerythynone (**13**, 7.3 mg), erythynone (**14**, 2.4 mg), and additional amounts of **8** (5.5 mg).

S7. Structures of known compounds 4-14 isolated from *M. caerulea*.

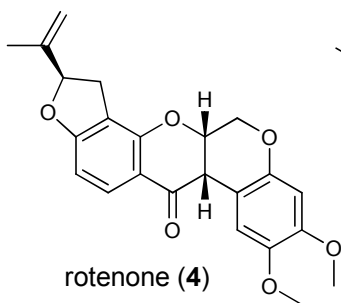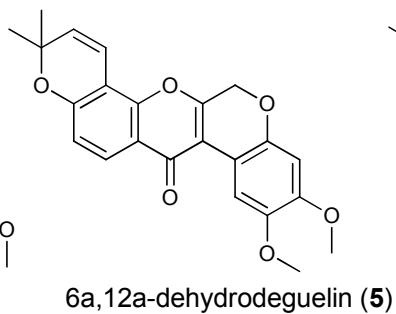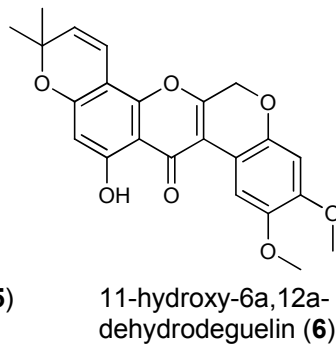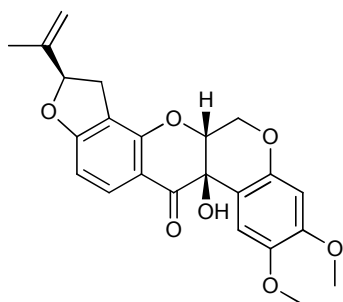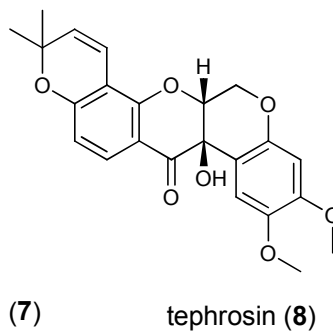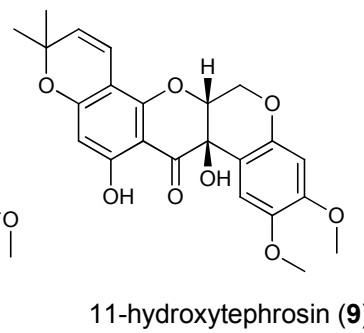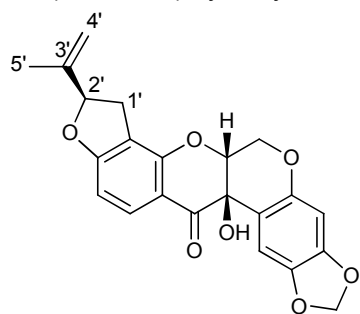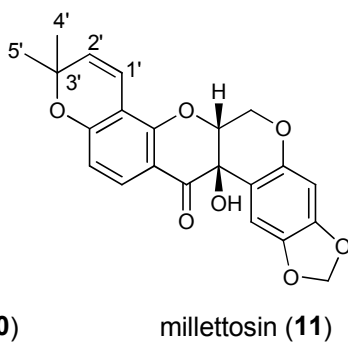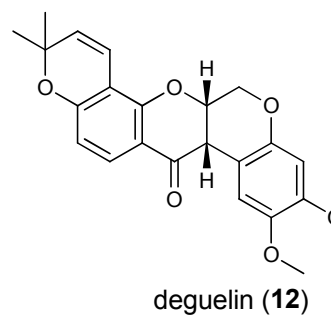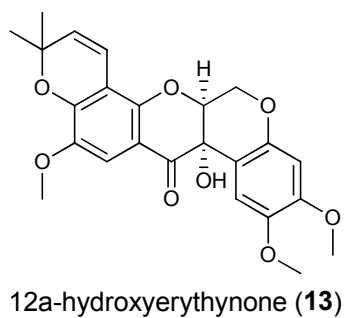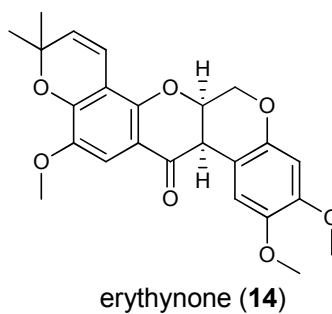



## S8. Characterization of known compounds **10-11** and **13-14**.

12a-hydroxyisomillettone (**10**): pale yellow powder;  $[\alpha]_D^{20}$  -108.0 (*c* 0.08, CHCl<sub>3</sub>); UV (MeOH)  $\lambda_{\max}$  (log  $\epsilon$ ) 209 (4.49) nm; 240 (sh, 4.10) nm; 296 (4.10) nm; ECD (MeOH) 245 ( $\Delta\epsilon$  4.39), 277 (-2.20), 299 (2.34), 322 (-7.26) nm; IR (film)  $\nu_{\max}$  3462, 3019, 2917, 2848, 1676, 1610, 1480, 1454, 1363, 1334, 1296, 1245, 1217, 1169, 1087, 1040, 941, 910, 758, 669 cm<sup>-1</sup>; <sup>1</sup>H NMR (400 MHz, CDCl<sub>3</sub>)  $\delta_H$  6.53<sup>a</sup> (H-1), 5.84 (br d, *J* = 8.3 Hz, H-2a), 6.45 (s, H-4), 4.57<sup>a</sup> (H-6ax), 4.47<sup>a</sup> (H-6eq), 4.57<sup>a</sup> (H-6a), 6.53<sup>a</sup> (H-10), 7.81 (d, *J* = 8.5 Hz, H-11), 2.93 (dd, *J* = 15.9, 8.5 Hz, H-1□a), 3.29 (dd, *J* = 15.7, 9.7 Hz, H-1□b), 5.24 (t, *J* = 8.8 Hz, H-2□), 4.94 (s, H-4□a), 5.06 (s, H-4□b), 1.76 (s, H-5□), 4.47<sup>a</sup> (OH-12a), and <sup>13</sup>C NMR (100 MHz, CDCl<sub>3</sub>)  $\delta_C$  106.2 (C-1), 110.2 (C-1a), 142.7 (C-2), 101.7 (C-2a), 149.8 (C-3), 99.4 (C-4), 149.7 (C-4a), 64.2 (C-6), 76.2 (C-6a), 158.0 (C-7a), 113.6 (C-8), 168.4 (C-9), 105.7 (C-10), 130.5 (C-11), 112.0 (C-11a), 191.3 (C-12), 68.1 (C-12a), 31.5 (C-1□), 88.4 (C-2□), 143.3 (C-3□), 113.1 (C-4□), 17.5 (C-5□); HRESIMS *m/z* 417.0937 [M + Na]<sup>+</sup> (calcd for C<sub>22</sub>H<sub>18</sub>O<sub>7</sub>Na, 417.0950). <sup>a</sup>Overlapping signals.

milletosin (**11**): pale yellow powder;  $[\alpha]_D^{20}$  -118.0 (*c* 0.09, CHCl<sub>3</sub>); UV (MeOH)  $\lambda_{\max}$  (log  $\epsilon$ ) 204 (4.40) nm; 271 (4.20) nm; 304 (3.88) nm; ECD (MeOH) 240 ( $\Delta\epsilon$  -4.62), 274 (3.77), 301 (0.80), 330 (-5.41) nm; IR (film)  $\nu_{\max}$  3452, 2924, 2850, 1676, 1600, 1578, 1505, 1480, 1375, 1331, 1274, 1211, 1166, 1112, 1084, 1033, 995, 891, 837, 745 cm<sup>-1</sup>; <sup>1</sup>H NMR (400 MHz, CDCl<sub>3</sub>)  $\delta_H$  6.54 (s, H-1), 5.85 (dd, *J* = 7.6, 1.2 Hz, H-2a), 6.46<sup>a</sup> (H-4), 4.61 (dd, 12.1, 2.3 Hz, H-6ax), 4.47 (d, 12.1 Hz, H-6eq), 4.54 (d, 1.5 Hz, H-6a), 6.46<sup>a</sup> (H-10), 7.71 (d, *J* = 8.7 Hz, H-11), 6.59 (d, *J* = 9.9 Hz, H-1□), 5.56 (d, *J* = 10.1 Hz, H-2□), 1.40 (s, H-4□), 1.45 (s, H-5□), 4.42 (s, OH-12a), and <sup>13</sup>C NMR (100 MHz, CDCl<sub>3</sub>)  $\delta_C$  106.2 (C-1), 110.1 (C-1a), 142.6 (C-2), 101.7 (C-2a), 149.9 (C-3), 99.5 (C-4), 149.7 (C-4a), 64.3 (C-6), 76.4 (C-6a), 157.0 (C-7a), 109.5 (C-8), 161.2 (C-9), 112.3 (C-10), 129.0 (C-11), 111.4 (C-11a), 191.6 (C-12), 68.0 (C-12a), 115.8 (C-1□), 129.3 (C-2□), 78.4 (C-3□), 28.7 (C-4□), 28.9 (C-5□); HRESIMS *m/z* 417.0941 [M + Na]<sup>+</sup> (calcd for C<sub>22</sub>H<sub>18</sub>O<sub>7</sub>Na, 417.0950). <sup>a</sup>Overlapping signals.

12a-hydroxyerythynone (**13**): pale yellow powder;  $[\alpha]_D^{20}$  +34.0 (*c* 0.09, MeOH); UV (MeOH)  $\lambda_{\max}$  (log  $\epsilon$ ) 207 (4.55) nm; 255 (4.31) nm; 320 (3.83) nm; ECD (MeOH) 233 ( $\Delta\epsilon$  -3.08), 246 (2.64), 287 (2.82), 335 (1.19), 372 (-2.02) nm; IR (film)  $\nu_{\max}$  3440, 2927, 2857, 1673, 1638, 1597, 1511, 1470, 1394, 1378, 1331, 1277, 1214, 1154, 1109, 1043, 888, 758, 742 cm<sup>-1</sup>; <sup>1</sup>H NMR (400 MHz, CDCl<sub>3</sub>)  $\delta_H$  6.59<sup>a</sup> (H-1), 6.48 (s, H-4), 4.61 (dd, 12.1, 2.4 Hz, H-6ax), 4.48 (d, 12.0 Hz, H-6eq), 4.55 (d, 1.4 Hz, H-6a), 7.23 (s, H-11), 6.59<sup>a</sup> (H-1□), 5.57 (d, *J* = 10.1 Hz, H-2□), 1.43 (s, H-4□), 1.51 (s, H-5□), 3.74 (s, OMe-2), 3.81 (s, OMe-3), 3.85 (s, OMe-10), 4.37 (br s, OH-12a), and <sup>13</sup>C NMR (100 MHz, CDCl<sub>3</sub>)  $\delta_C$  109.9<sup>a</sup> (C-1), 109.2 (C-1a), 144.4 (C-2), 151.5 (C-3), 101.5 (C-4), 148.9 (C-4a), 64.3 (C-6), 76.9 (C-6a), 152.4 (C-7a), 110.6 (C-8), 151.2 (C-9), 144.9 (C-10), 108.1 (C-11), 109.9<sup>a</sup> (C-11a), 191.7 (C-12), 68.0 (C-12a), 116.1 (C-1□), 129.3 (C-2□), 78.9 (C-3□), 28.5 (C-4□), 28.9 (C-5□), 56.8<sup>a</sup> (OMe-2), 56.3 (OMe-3), 56.8<sup>a</sup> (OMe-10); HRESIMS *m/z* 463.1366 [M + Na]<sup>+</sup> (calcd for C<sub>24</sub>H<sub>24</sub>O<sub>8</sub>Na, 463.1369). <sup>a</sup>Overlapping signals.

erythynone (**14**): pale yellow powder;  $[\alpha]_D^{20} +12.0$  (*c* 0.09, MeOH); UV (MeOH)  $\lambda_{\max}$  (log  $\epsilon$ ) 206 (4.50) nm; 255 (4.19) nm; 320 (3.76) nm; ECD (MeOH) 233 ( $\Delta\epsilon$  -1.00), 247 (1.34), 289 (1.54), 336 (1.00), 370 (-1.29) nm; IR (film)  $\nu_{\max}$  2927, 2857, 1667, 1638, 1597, 1511, 1467, 1391, 1378, 1350, 1274, 1207, 1173, 1131, 1100, 1090, 755  $\text{cm}^{-1}$ ;  $^1\text{H}$  NMR (400 MHz,  $\text{CDCl}_3$ )  $\delta_{\text{H}}$  6.82 (s, H-1), 6.46 (s, H-4), 4.63 (dd,  $J = 12.0, 3.1$  Hz, H-6ax), 4.18 (d, 12.1 Hz, H-6eq), 4.89 (t, 3.4 Hz, H-6a), 7.28 (s, H-11), 3.85<sup>a</sup> (H-12a), 6.64 (d,  $J = 10.1$  Hz, H-1□), 5.58 (d,  $J = 10.0$  Hz, H-2□), 1.44 (s, H-4□), 1.52 (s, H-5□), 3.78 (s, OMe-2), 3.81 (s, OMe-3), 3.85<sup>a</sup> (OMe-10), and  $^{13}\text{C}$  NMR (100 MHz,  $\text{CDCl}_3$ )  $\delta_{\text{C}}$  110.7 (C-1), 105.2 (C-1a), 144.2 (C-2), 149.8 (C-3), 101.3 (C-4), 147.8 (C-4a), 66.8 (C-6), 73.0 (C-6a), 152.6 (C-7a), 110.6 (C-8), 150.4 (C-9), 144.6 (C-10), 108.2 (C-11), 111.6 (C-11a), 189.7 (C-12), 44.8 (C-12a), 116.4 (C-1□), 129.2 (C-2□), 78.6 (C-3□), 28.4 (C-4□), 28.8 (C-5□), 56.7<sup>a</sup> (OMe-2), 56.3 (OMe-3), 56.7<sup>a</sup> (OMe-10); HRESIMS  $m/z$  447.1436  $[\text{M} + \text{Na}]^+$  (calcd for  $\text{C}_{24}\text{H}_{24}\text{O}_7\text{Na}$ , 447.1420). <sup>a</sup>Overlapping signals.

S9.  $^1\text{H}$  NMR spectrum of **1** from -1.0 to 10.0 ppm ( $\text{CDCl}_3$ , 400 MHz).

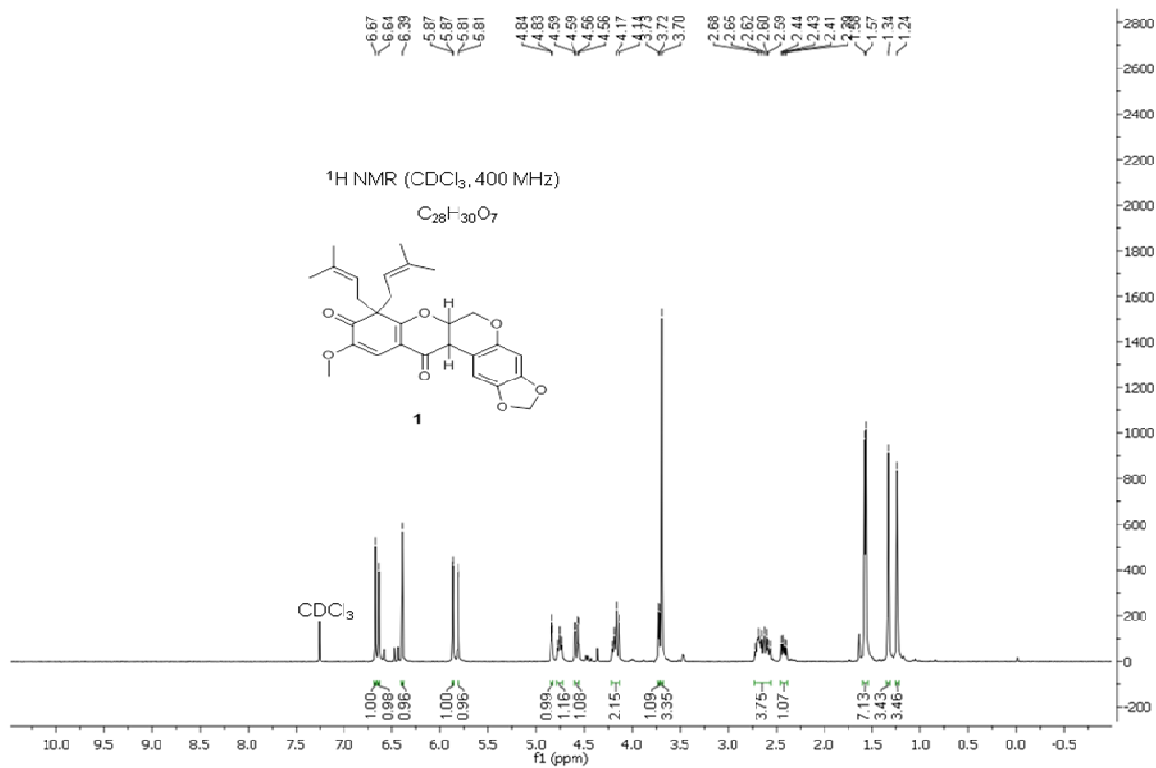

S10. Amplification of region 1.0-3.0 ppm of  $^1\text{H}$  NMR spectrum of **1** ( $\text{CDCl}_3$ , 400 MHz).

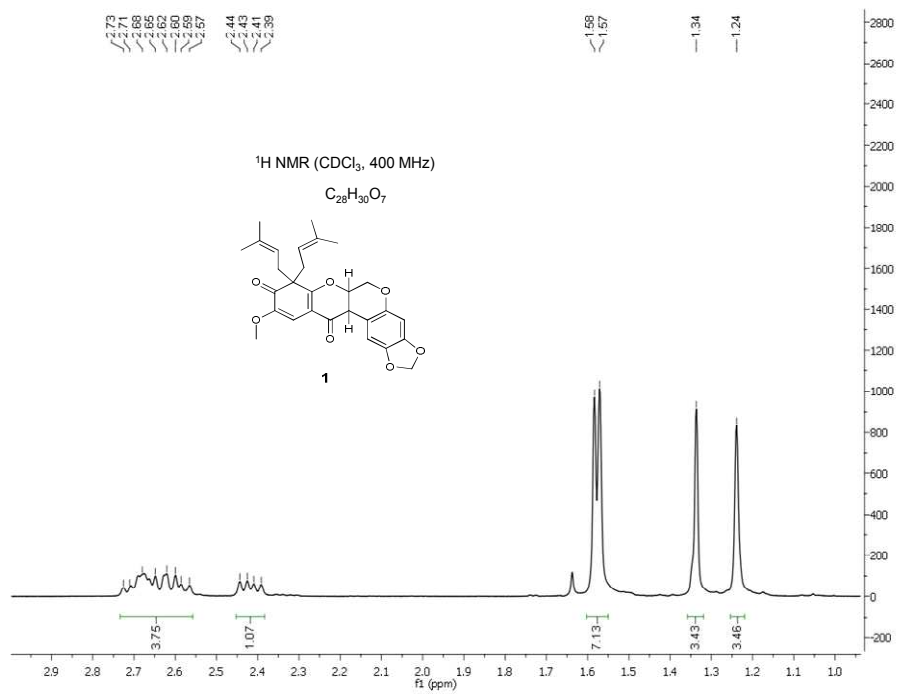

S11. Amplification of region 3.3-5.0 ppm of  $^1\text{H}$  NMR spectrum of **1** ( $\text{CDCl}_3$ , 400 MHz).

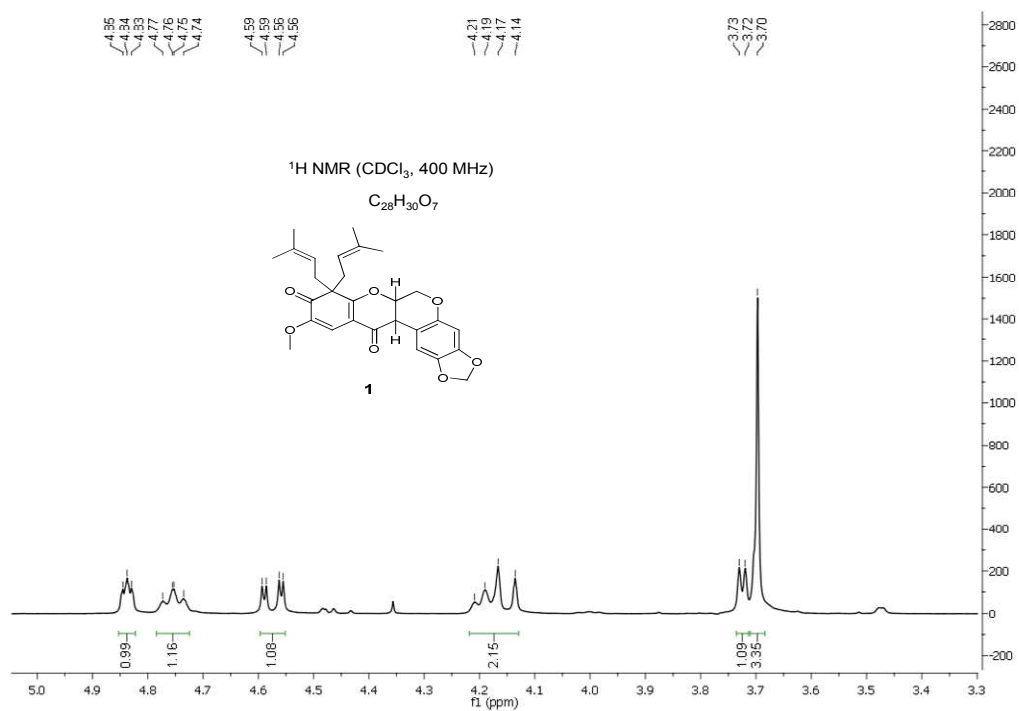

S12. Amplification of region 5.5-7.5 ppm of  $^1\text{H}$  NMR spectrum of **1** ( $\text{CDCl}_3$ , 400 MHz).

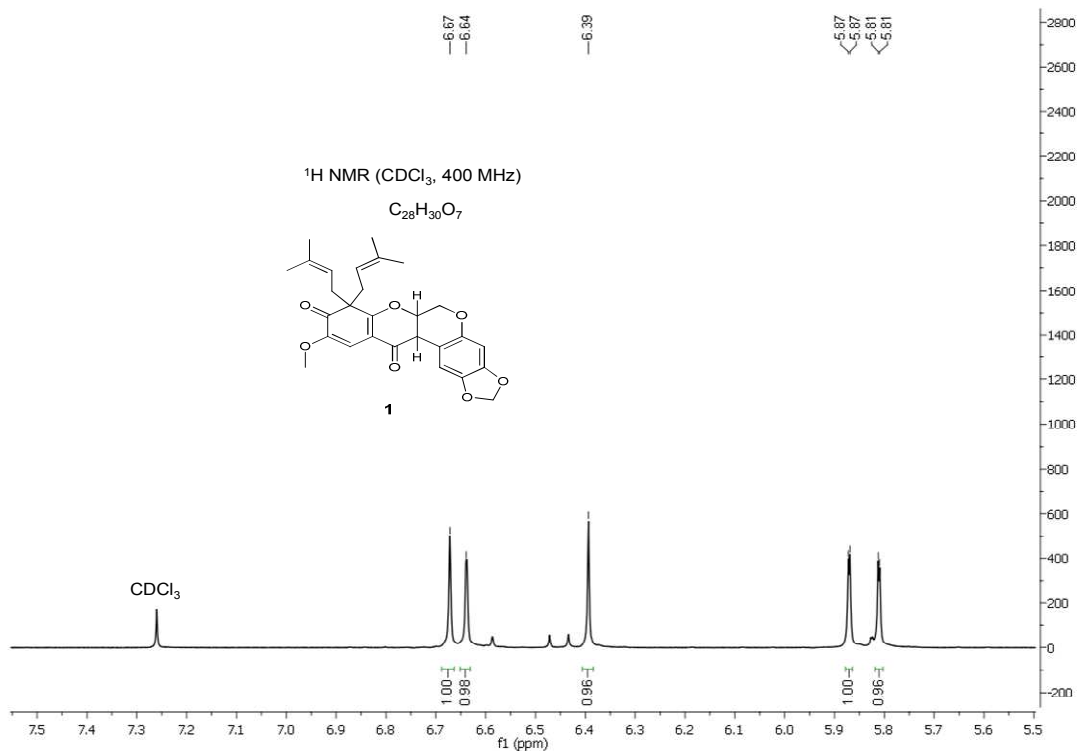

S13.  $^{13}\text{C}$  NMR spectrum of **1** from -10.0 to 210 ppm ( $\text{CDCl}_3$ , 100 MHz).

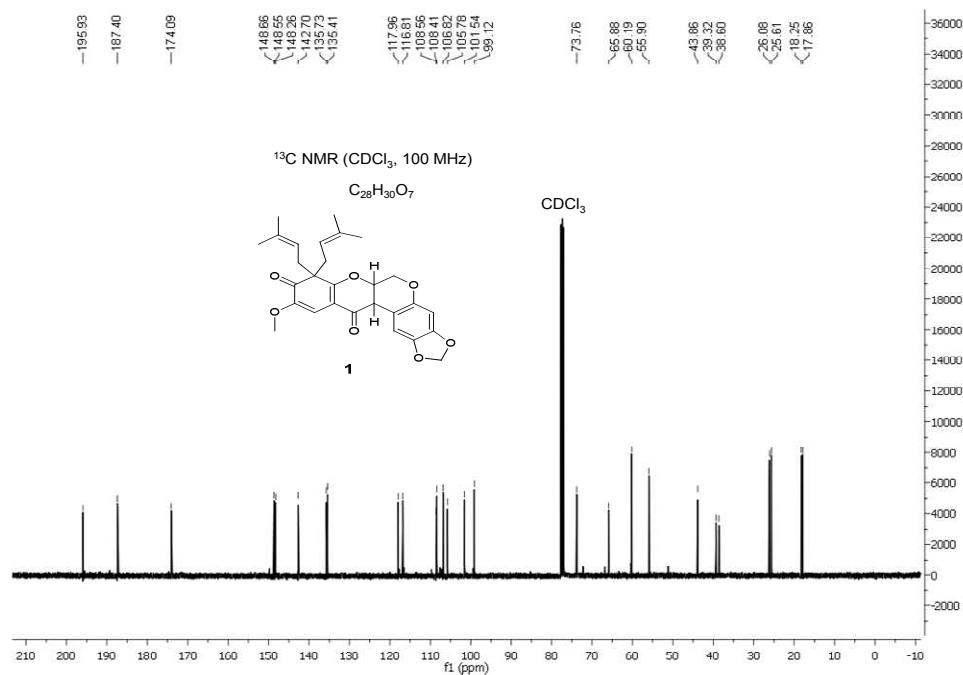

S14. Amplification of region 0 - 80.0 ppm  $^{13}\text{C}$  NMR spectrum of **1** ( $\text{CDCl}_3$ , 100 MHz).

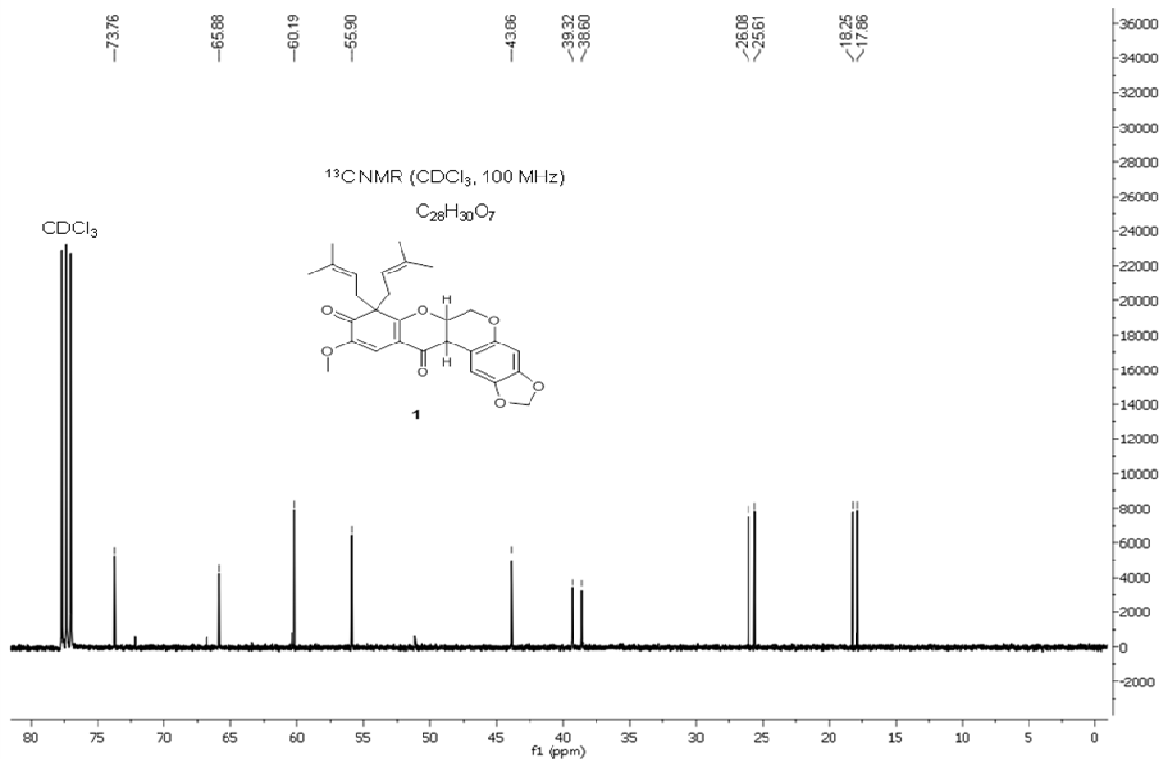

**S15.** Amplification of region 95.0 - 150.0 ppm  $^{13}\text{C}$  NMR spectrum of **1** ( $\text{CDCl}_3$ , 100 MHz).

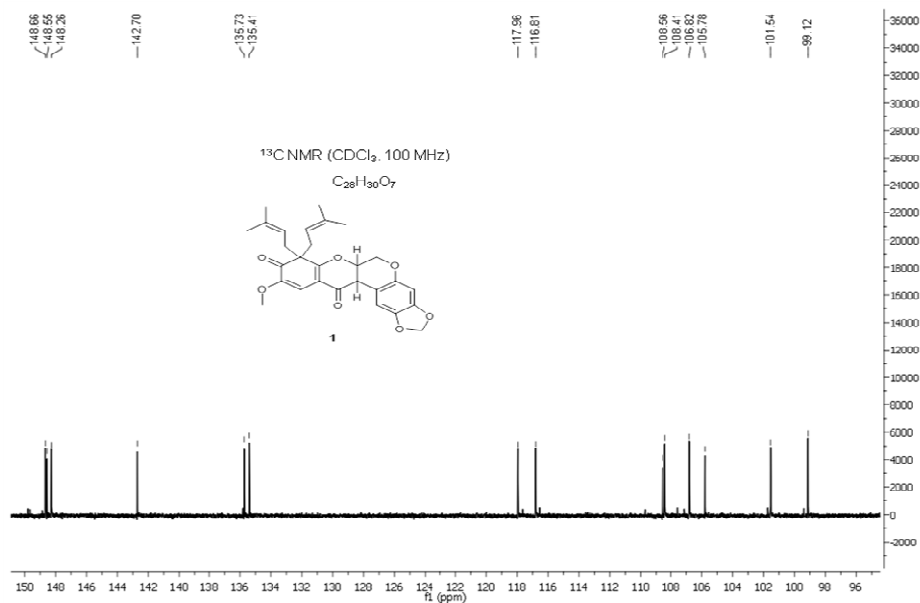

**S16.**  $^{13}\text{C}$  DEPT 135 NMR spectrum of **1** ( $\text{CDCl}_3$ , 100 MHz).

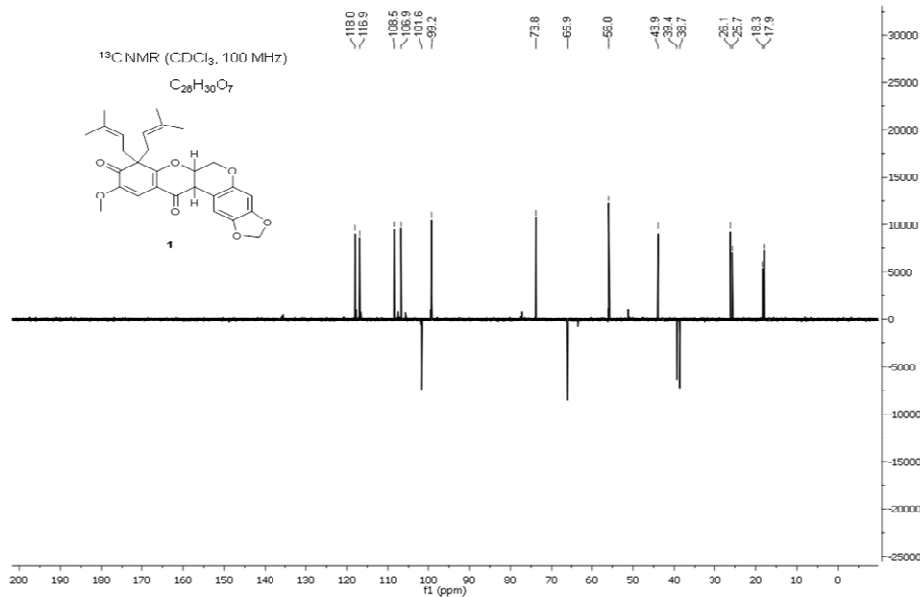

S17. HSQC NMR spectrum of **1** (CDCl<sub>3</sub>, 400 MHz).

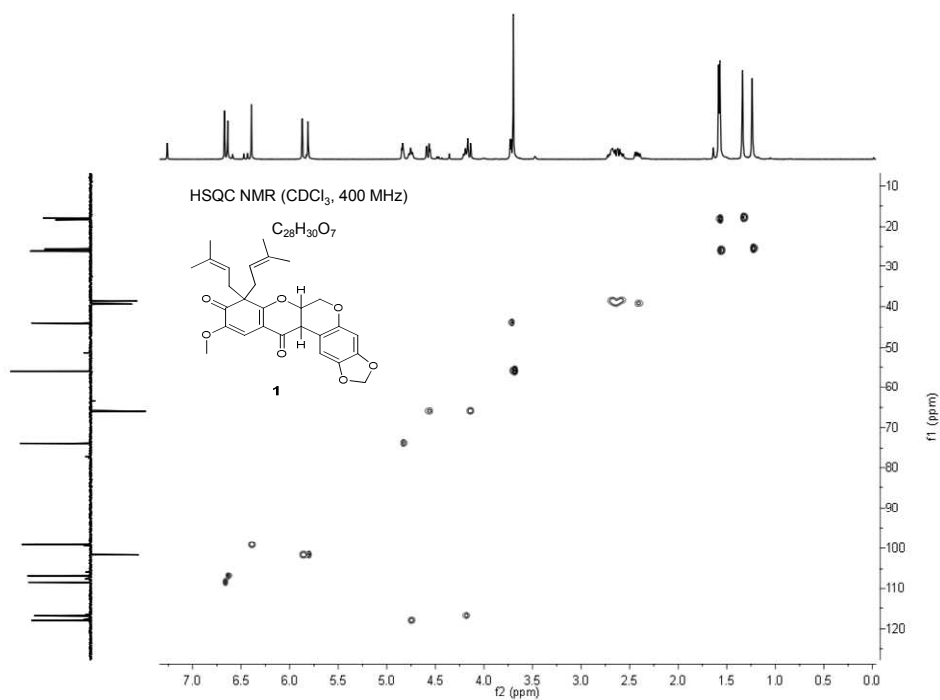

S18. <sup>1</sup>H-<sup>1</sup>H COSY NMR spectrum of **1** (CDCl<sub>3</sub>, 400 MHz).

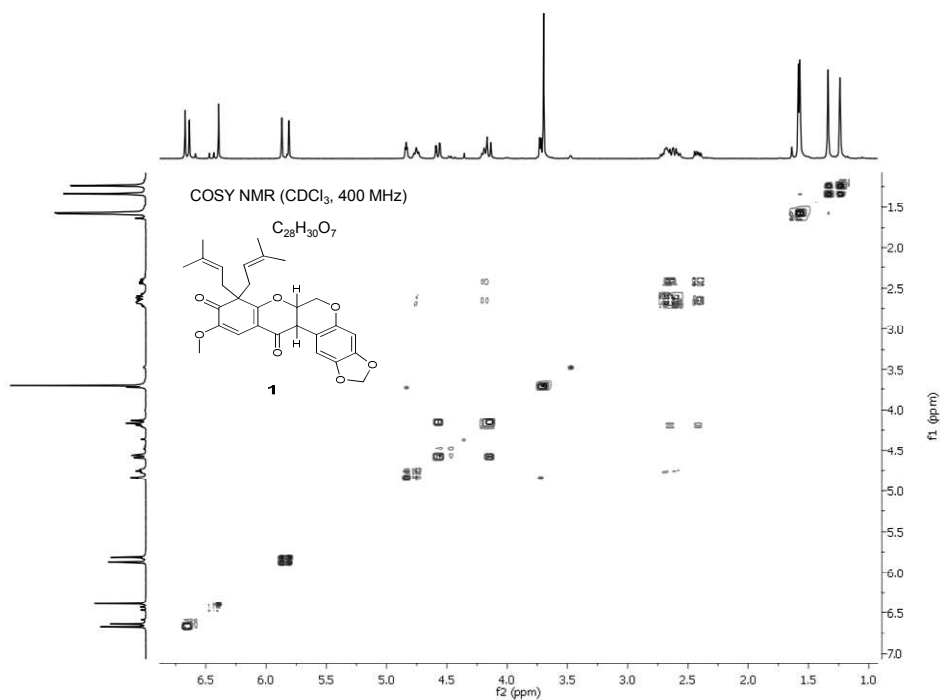

S19. HMBC NMR spectrum of **1** (CDCl<sub>3</sub>, 400 MHz).

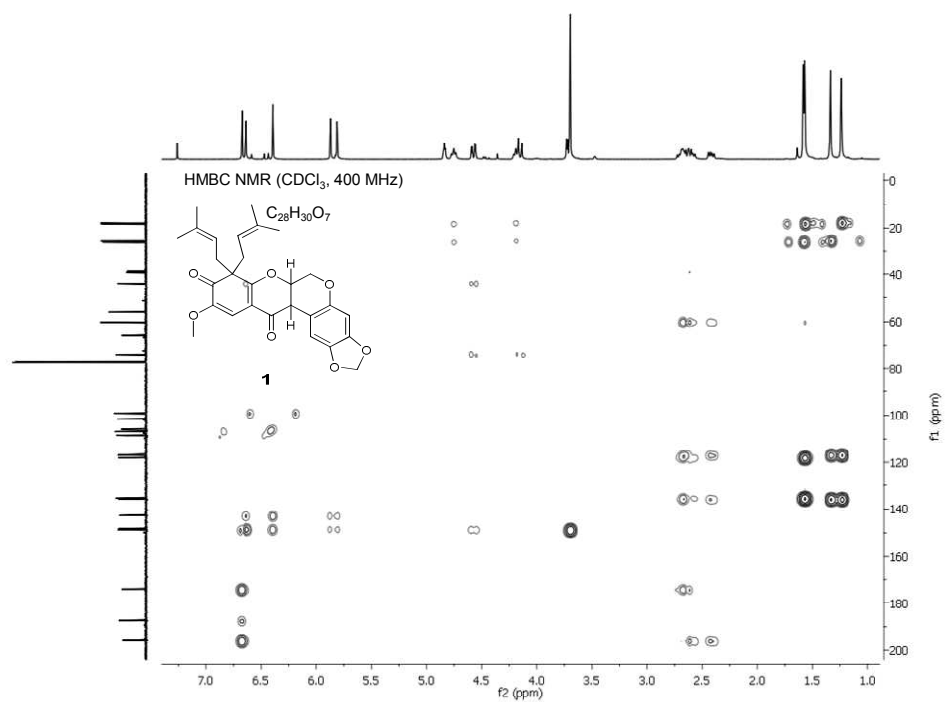

S20. NOESY NMR spectrum of **1** (CDCl<sub>3</sub>, 400 MHz).

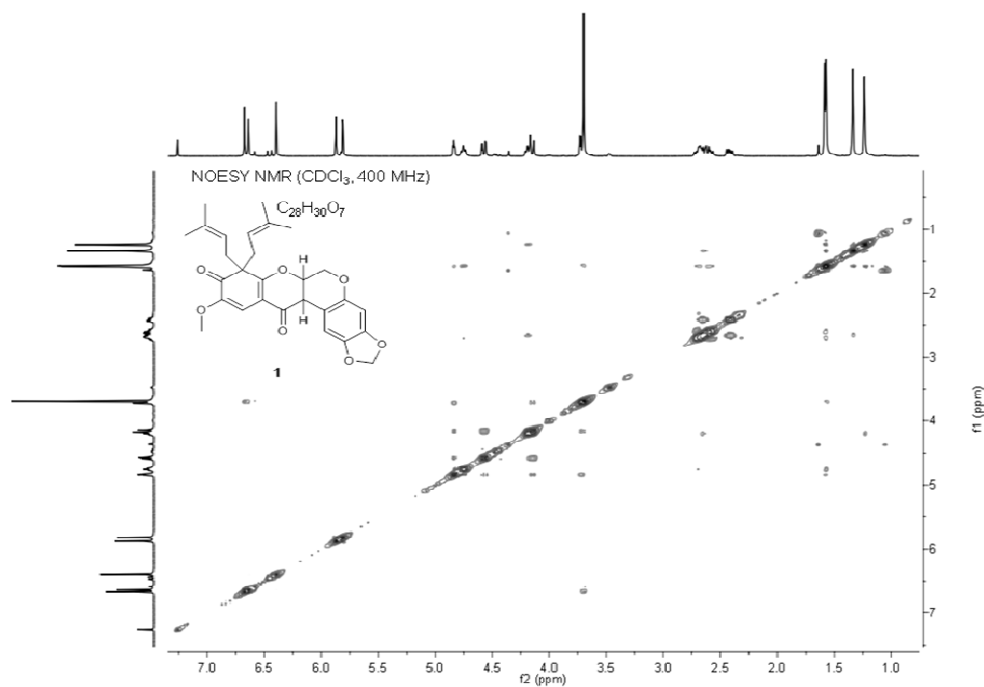



**S21.**  $^1\text{H}$  NMR spectrum of **2** from -1.0 to 10.0 ppm ( $\text{CDCl}_3$  with 0.05% v/v TMS, 400 MHz).

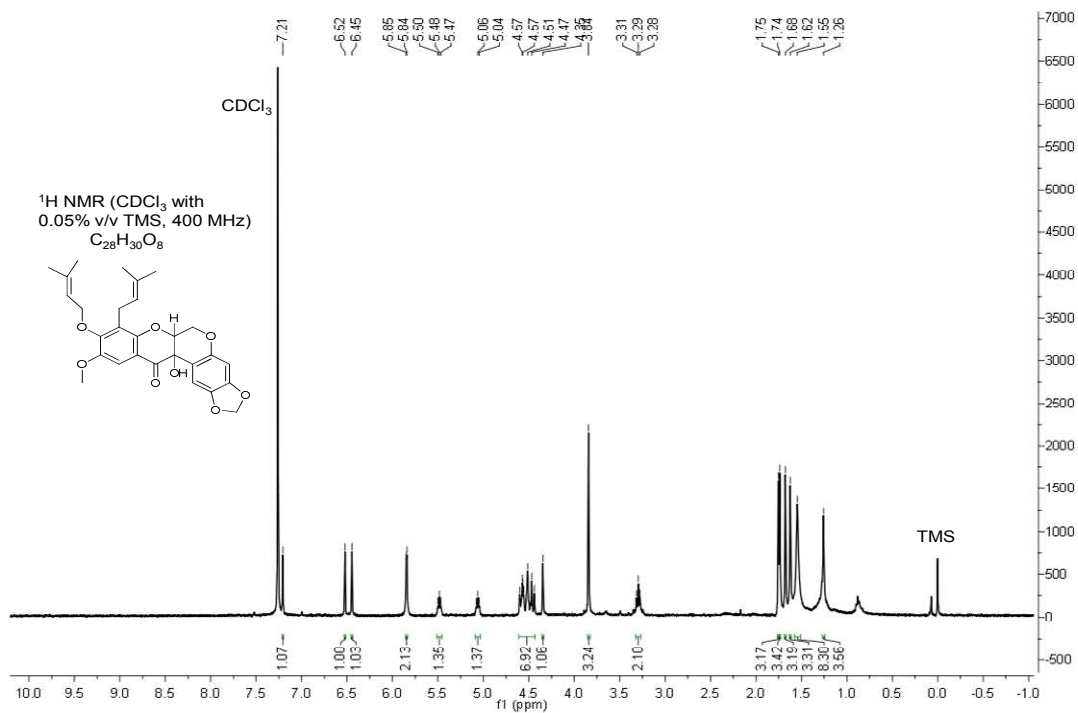

**S22.** Amplification of region 3.2 – 5.9 ppm  $^1\text{H}$  NMR spectrum of **2** ( $\text{CDCl}_3$  with 0.05% v/v TMS, 400 MHz).

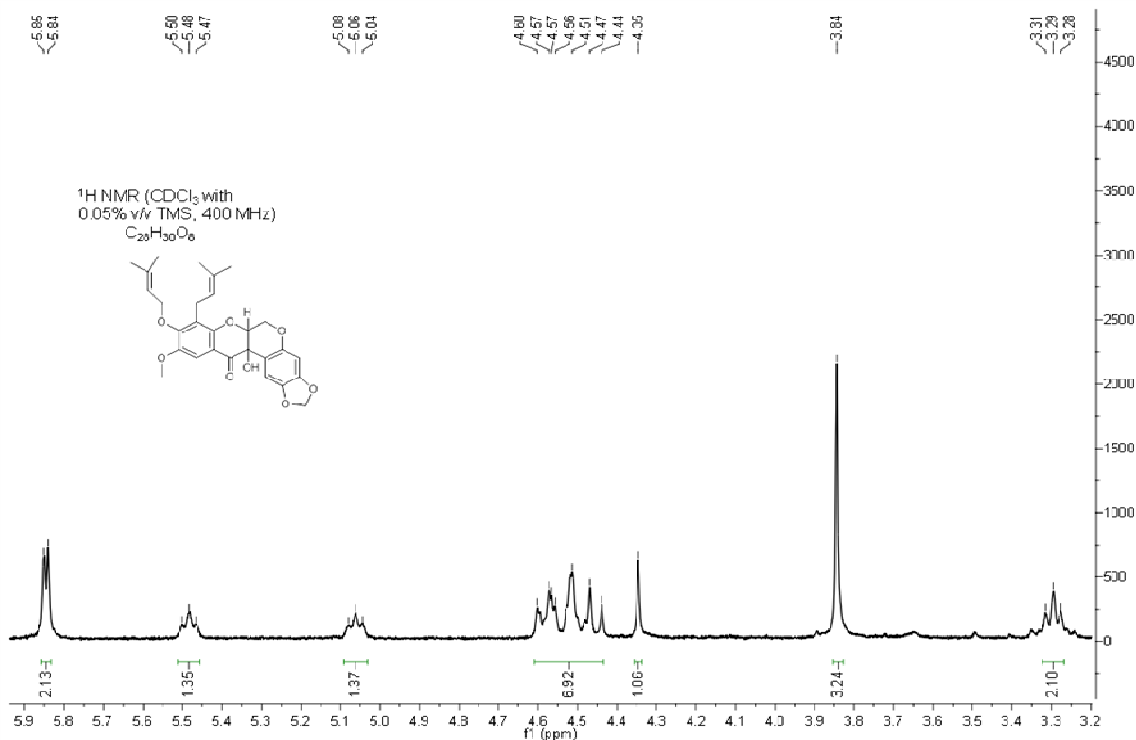

S23.  $^{13}\text{C}$  DEPT 135 NMR spectrum of **2** ( $\text{CDCl}_3$ , 100 MHz).

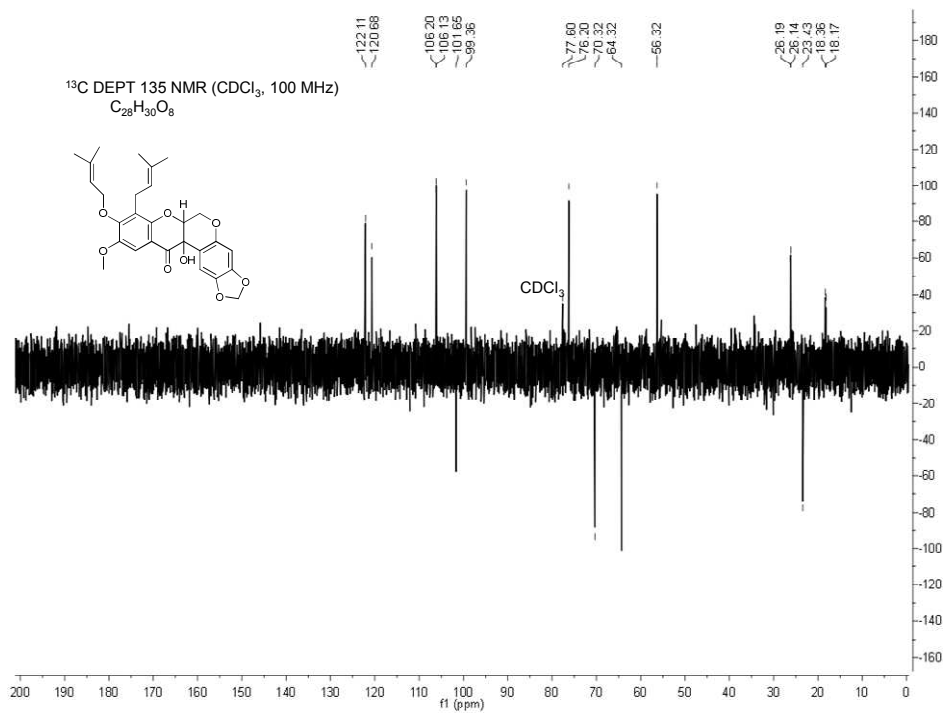

S24.  $^{13}\text{C}$  NMR spectrum of **2** ( $\text{CDCl}_3$ , 100 MHz).

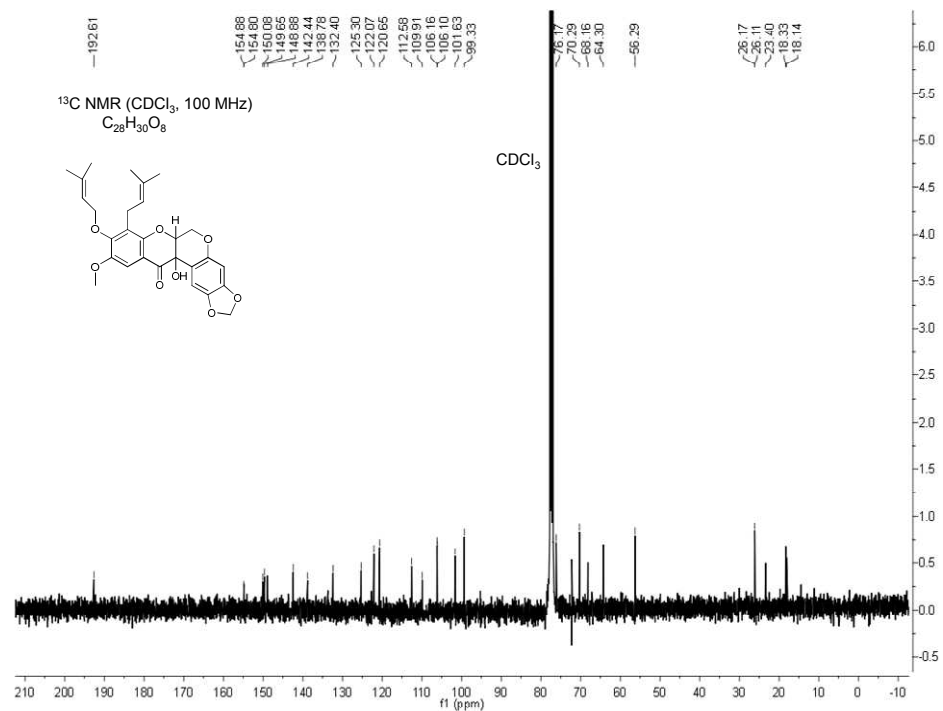

S25. Amplification of region 98.0 – 158.0 ppm  $^{13}\text{C}$  NMR spectrum of **2** ( $\text{CDCl}_3$ , 100 MHz).

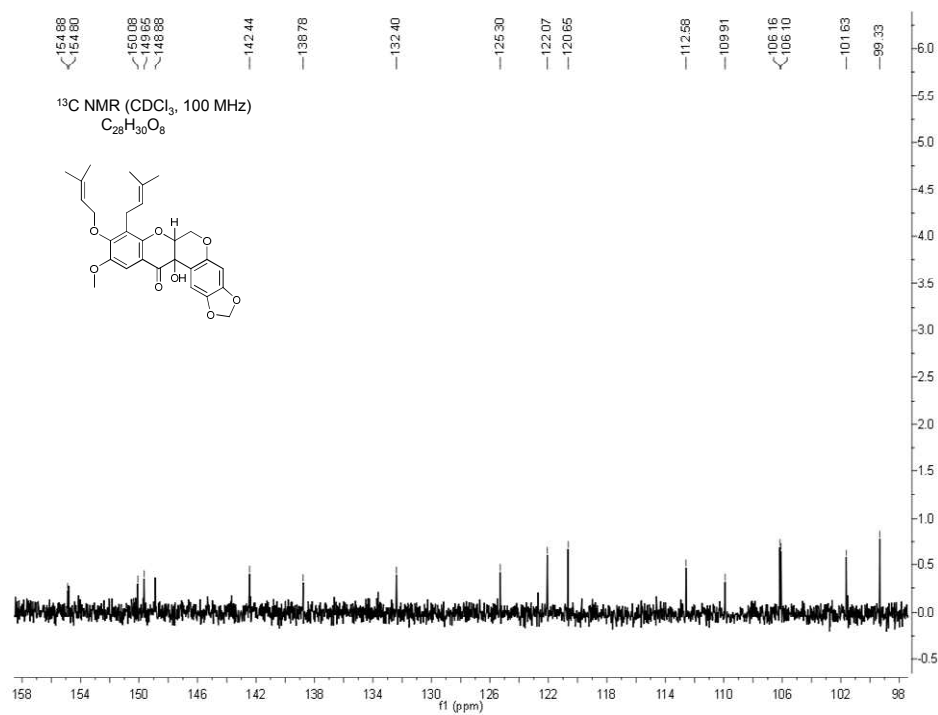

S26. HSQC NMR spectrum of **2** ( $\text{CDCl}_3$ , 400 MHz).

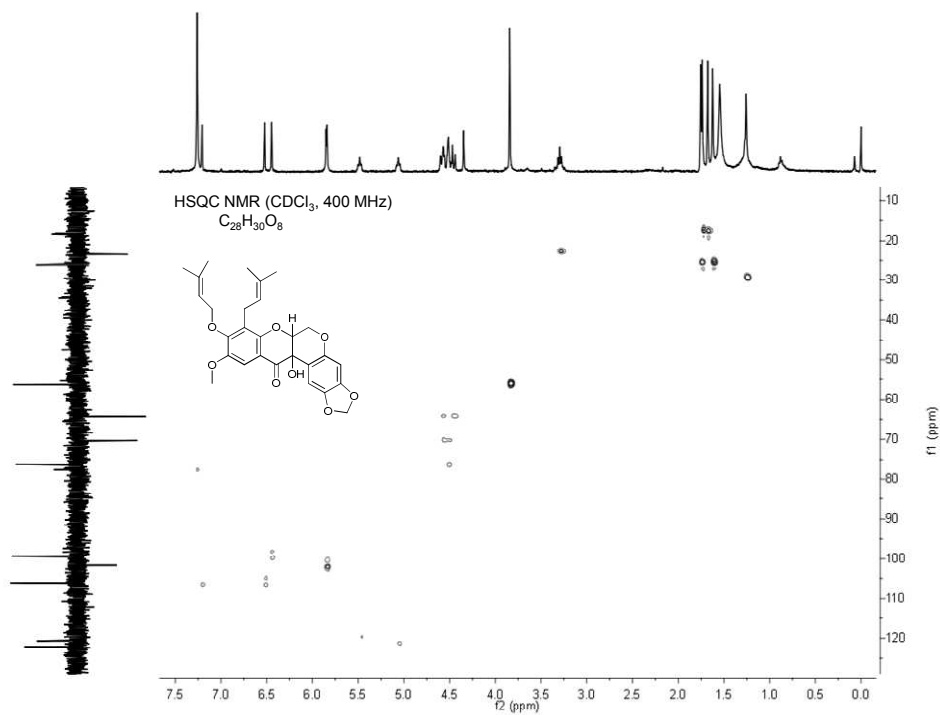

S27.  $^1\text{H}$ - $^1\text{H}$  COSY NMR spectrum of **2** ( $\text{CDCl}_3$ , 400 MHz).

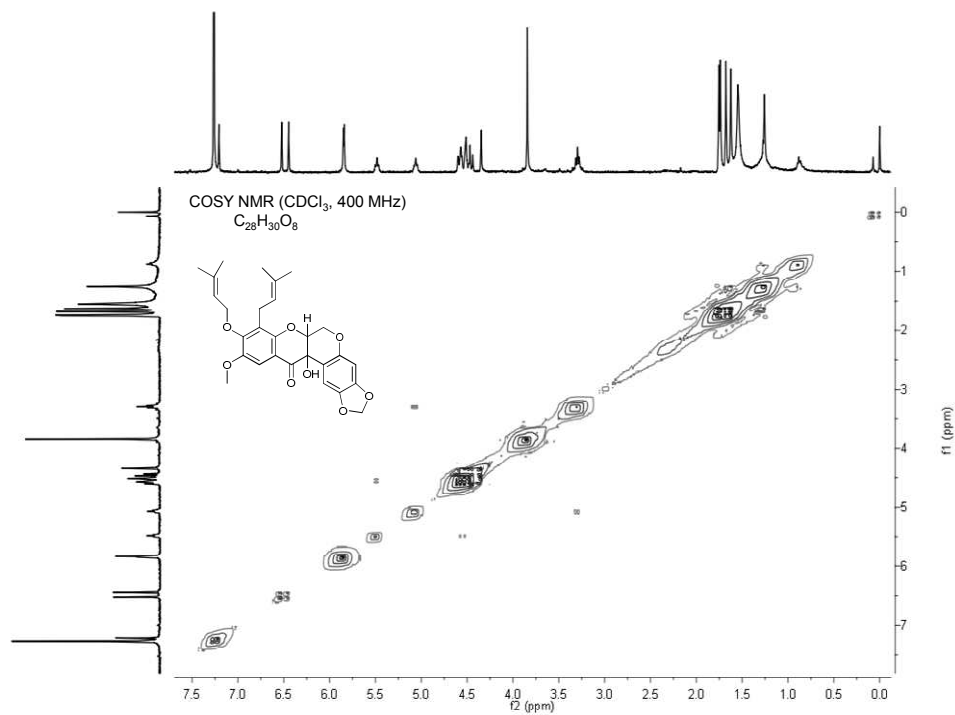

S28. HMBC NMR spectrum of **2** ( $\text{CDCl}_3$ , 400 MHz).

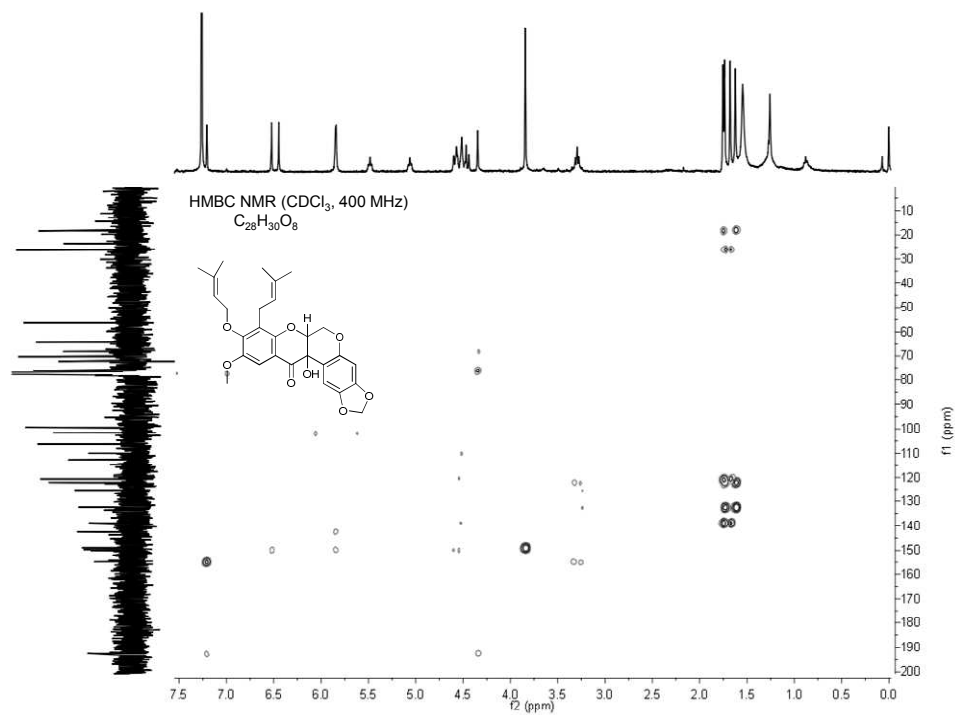

**S29.** NOESY NMR spectrum of **2** (CDCl<sub>3</sub>, 400 MHz).

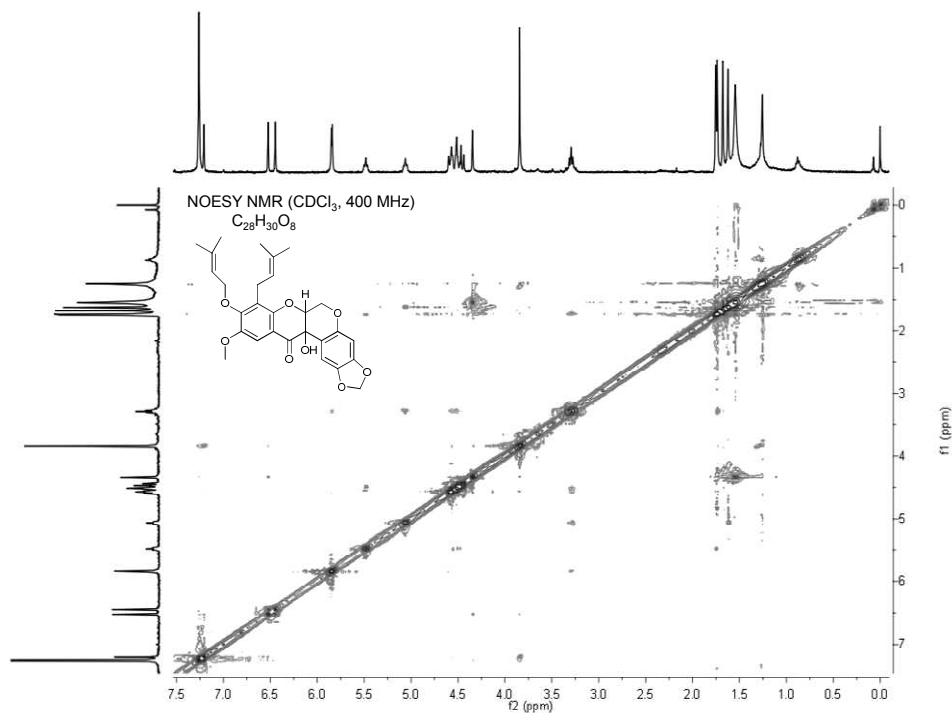

**S30.** <sup>1</sup>H NMR spectrum of **3** from -1.0 to 10.0 ppm (CDCl<sub>3</sub> with 0.05% v/v TMS, 400 MHz).

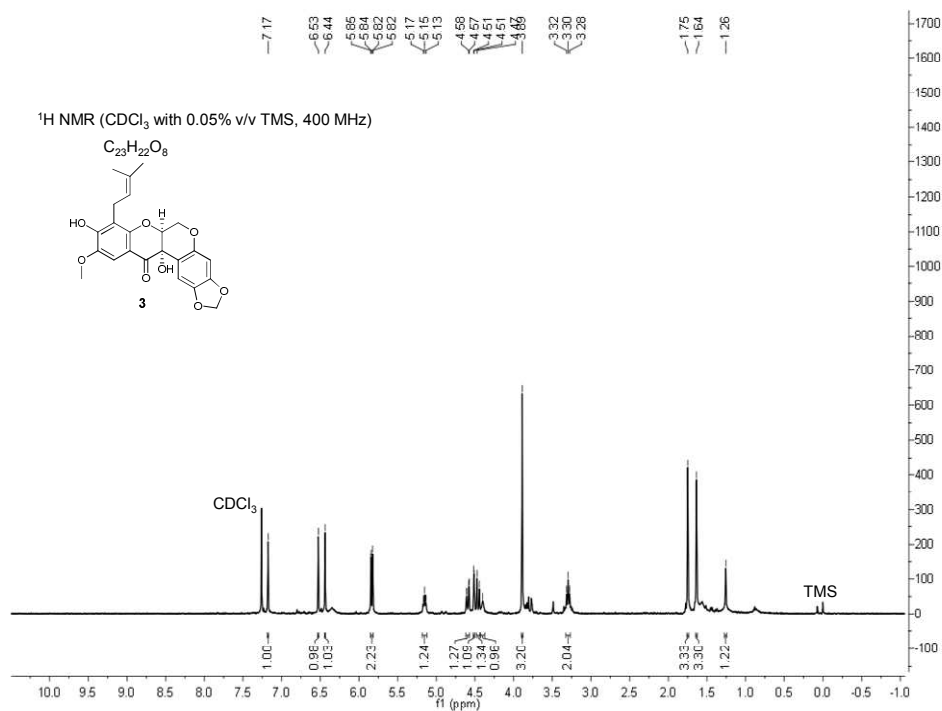

S31.  $^{13}\text{C}$  DEPT 135 NMR spectrum of **3** ( $\text{CDCl}_3$ , 100 MHz).

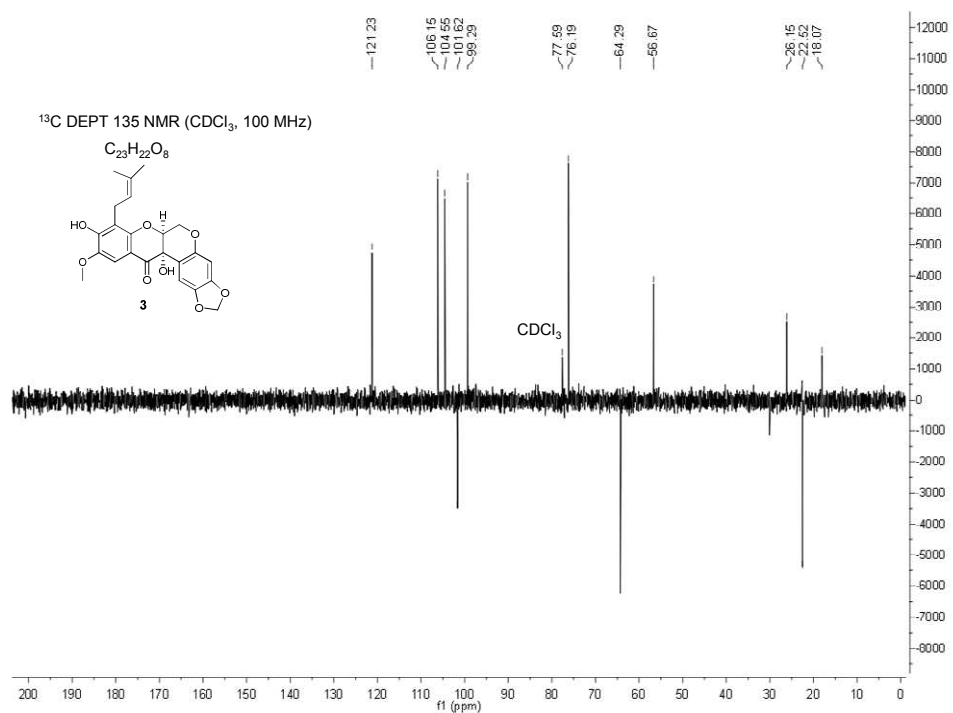

S32.  $^{13}\text{C}$  NMR spectrum of **3** ( $\text{CDCl}_3$ , 100 MHz).

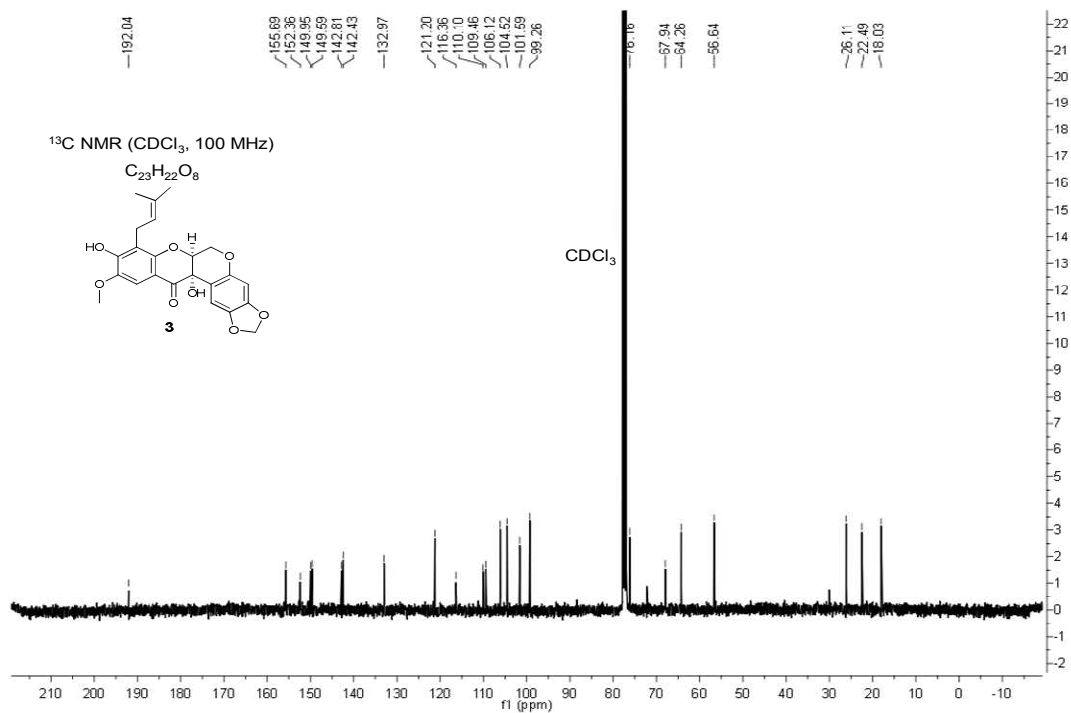

S33. Amplification of region 95.0 – 160.0 ppm  $^{13}\text{C}$  NMR spectrum of **3** ( $\text{CDCl}_3$ , 100 MHz).

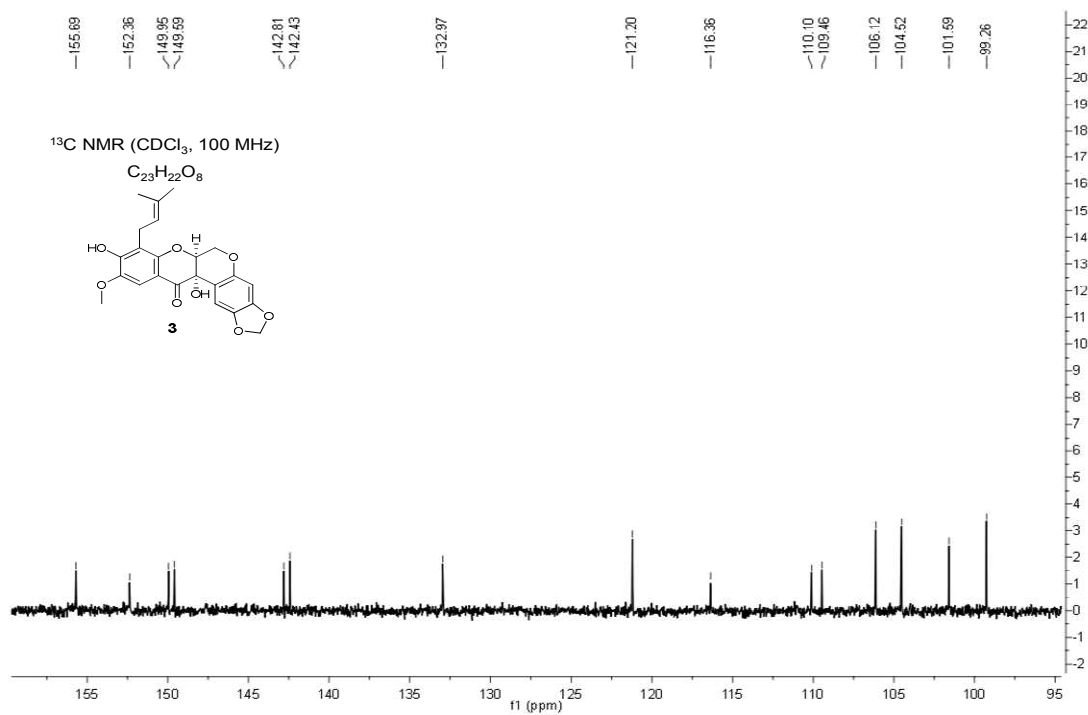

S34. HSQC NMR spectrum of **3** ( $\text{CDCl}_3$ , 400 MHz).

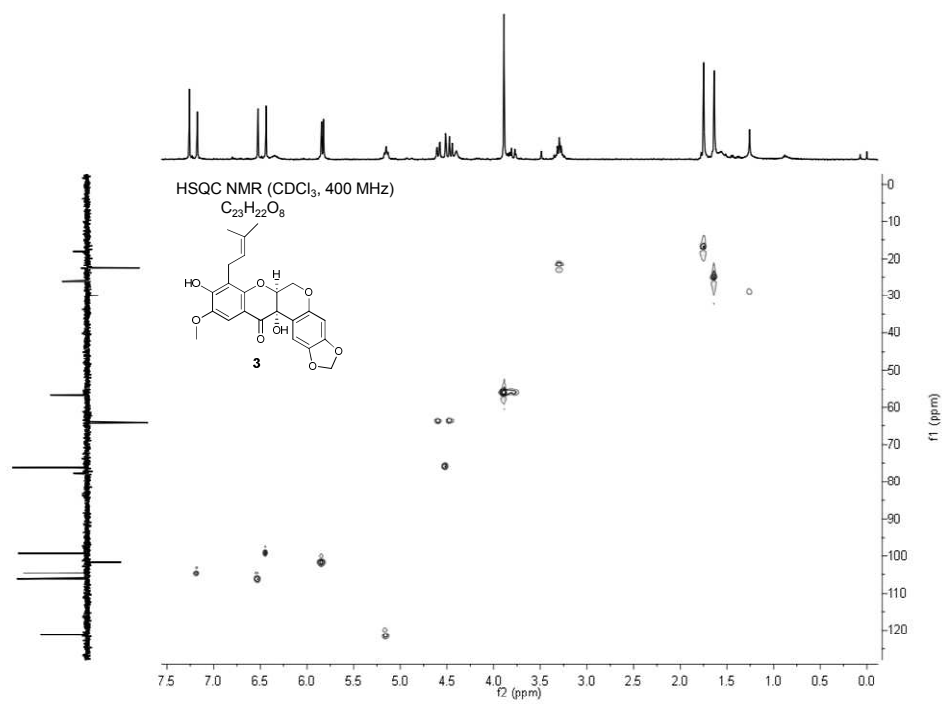

S35.  $^1\text{H}$ - $^1\text{H}$  COSY NMR spectrum of **3** ( $\text{CDCl}_3$ , 400 MHz).

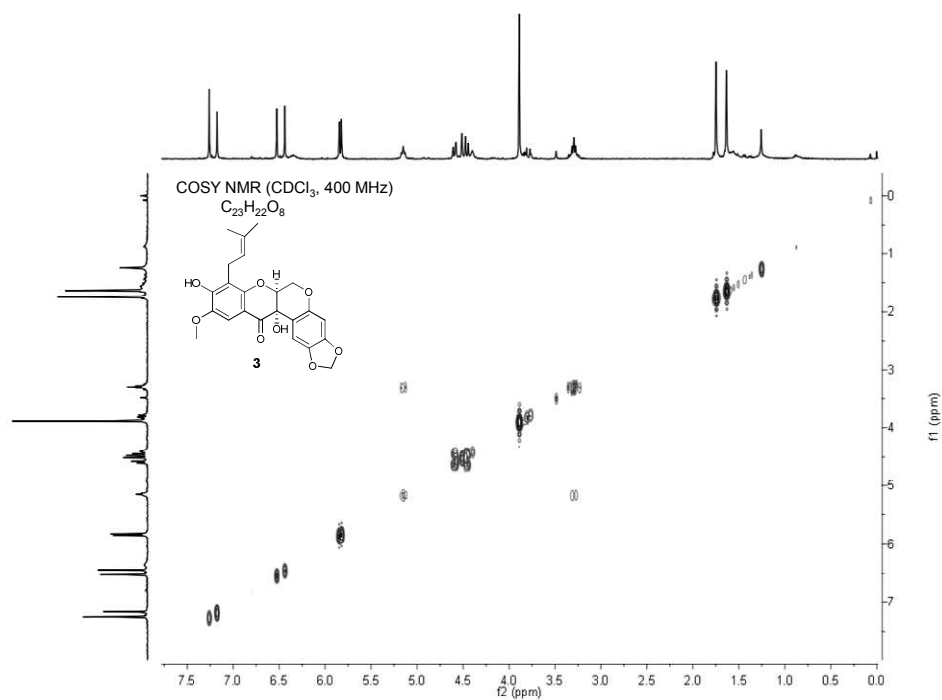

S36. HMBC NMR spectrum of **3** ( $\text{CDCl}_3$ , 400 MHz).

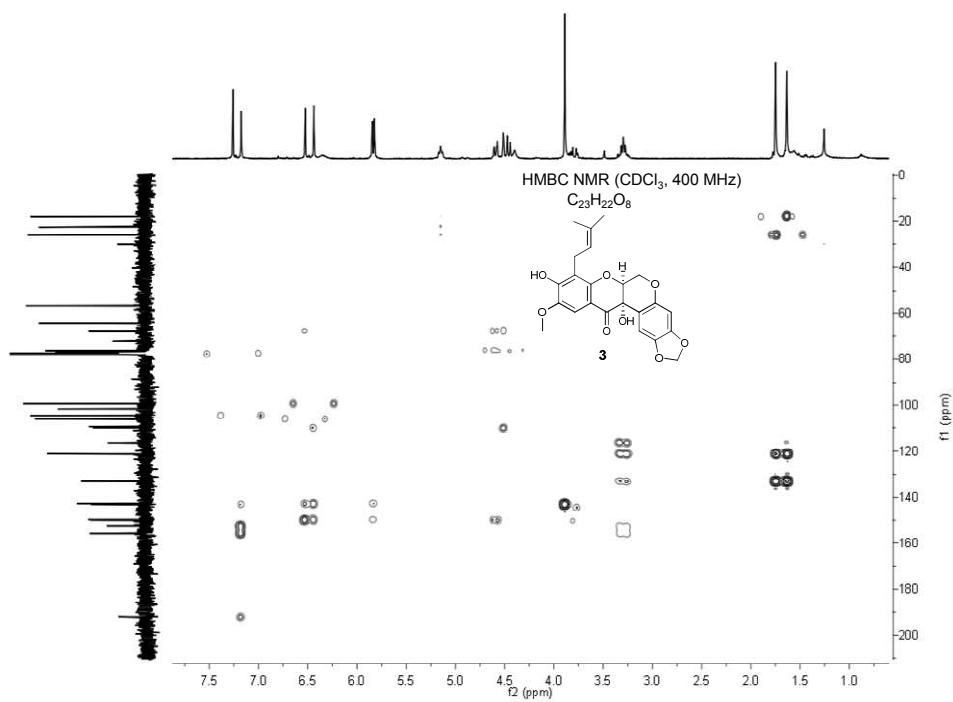



S37. NOESY NMR spectrum of **3** (CDCl<sub>3</sub>, 400 MHz).

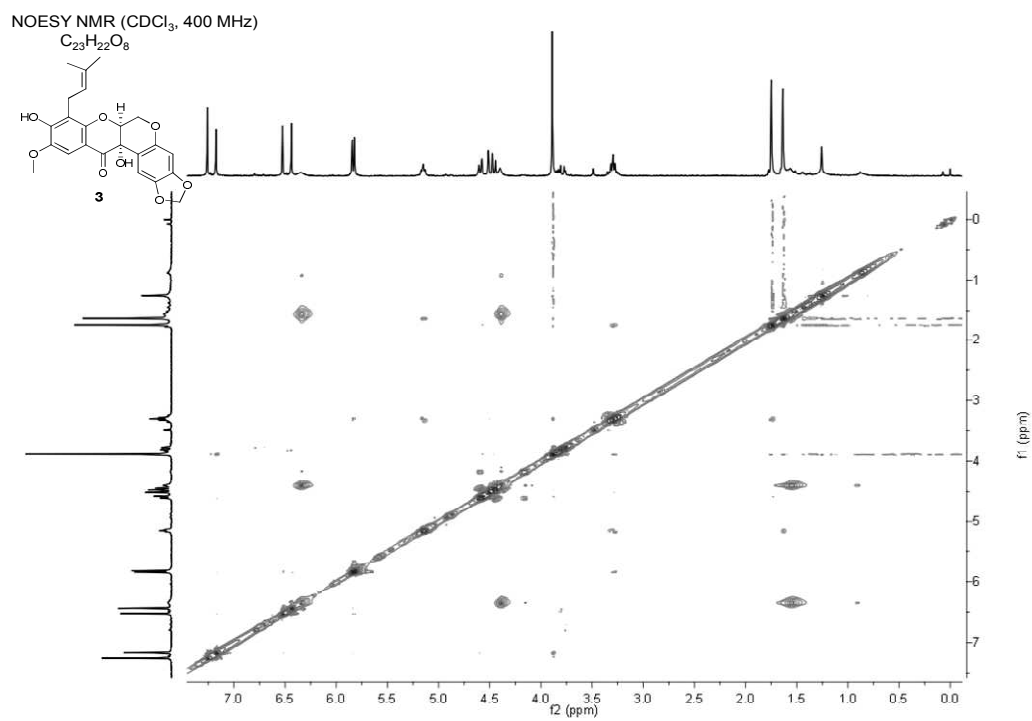

**S38.** Procedures used for in vitro testing of isolates.

**Quinone reductase induction assay.** The quinone reductase induction assay was performed using Hepa 1c1c7 murine hepatoma cells, according to a standard procedure.<sup>1,2</sup> L-Sulforaphane was used as the positive control.

**Mitochondria transmembrane potential (MTP) assay.** The MTP assay was performed using HT-29 human colon cancer cells, according to a standard protocol.<sup>3</sup> Staurosporine was used as a positive control.

**Cytotoxicity assay.** Sulforhodamine B (SRB) assay was used for cytotoxicity-guided fractionation and for testing the cytotoxicity of isolated compounds against HT-29 cells, according to a standard protocol.<sup>4</sup> Paclitaxel was used as the positive control.

**References:**

- (1) Jang, D. S.; Park, E. J.; Kang, Y.-H.; Hawthorne, M. E.; Vigo, J. S.; Graham, J. G.; Cabieses, F.; Fong, H. H. S.; Mehta, R. G.; Pezzuto, J. M.; Kinghorn, A. D. *J. Nat. Prod.* **2003**, *66*, 1166-1170.
- (2) Prochaska, H. J.; Santamaria, A. B. *Anal. Biochem.* **1988**, *169*, 328-336.
- (3) Deng, Y.; Balunas, M. J.; Kim, J.-A.; Lantvit, D. D.; Chin, Y.-W.; Chai, H.-B.; Sugiarto, S.; Kardono, L. B. S.; Fong, H. H. S.; Pezzuto, J. M.; Swanson, S. M.; Carcache de Blanco, E. J.; Kinghorn, A. D. *J. Nat. Prod.* **2009**, *72*, 1165-1169.
- (4) Pan, L.; Kardono, L. B. S.; Riswan, S.; Chai, H. B.; Carcache de Blanco, E. J.; Pannell, C. M.; Soejarto, D. D.; McCloud, T. G.; Newman, D. J.; Kinghorn, A. D. *J. Nat. Prod.* **2010**, *73*, 1873-1878.
